# Supplementary material
Source: MDPI journal article supplement (https://www.mdpi.com/search?q=molbank-2021-M1186)
Supplement: s001 [file molbank-2021-M1186-s001.pdf]

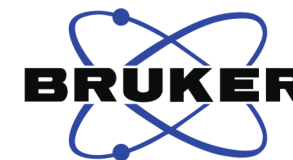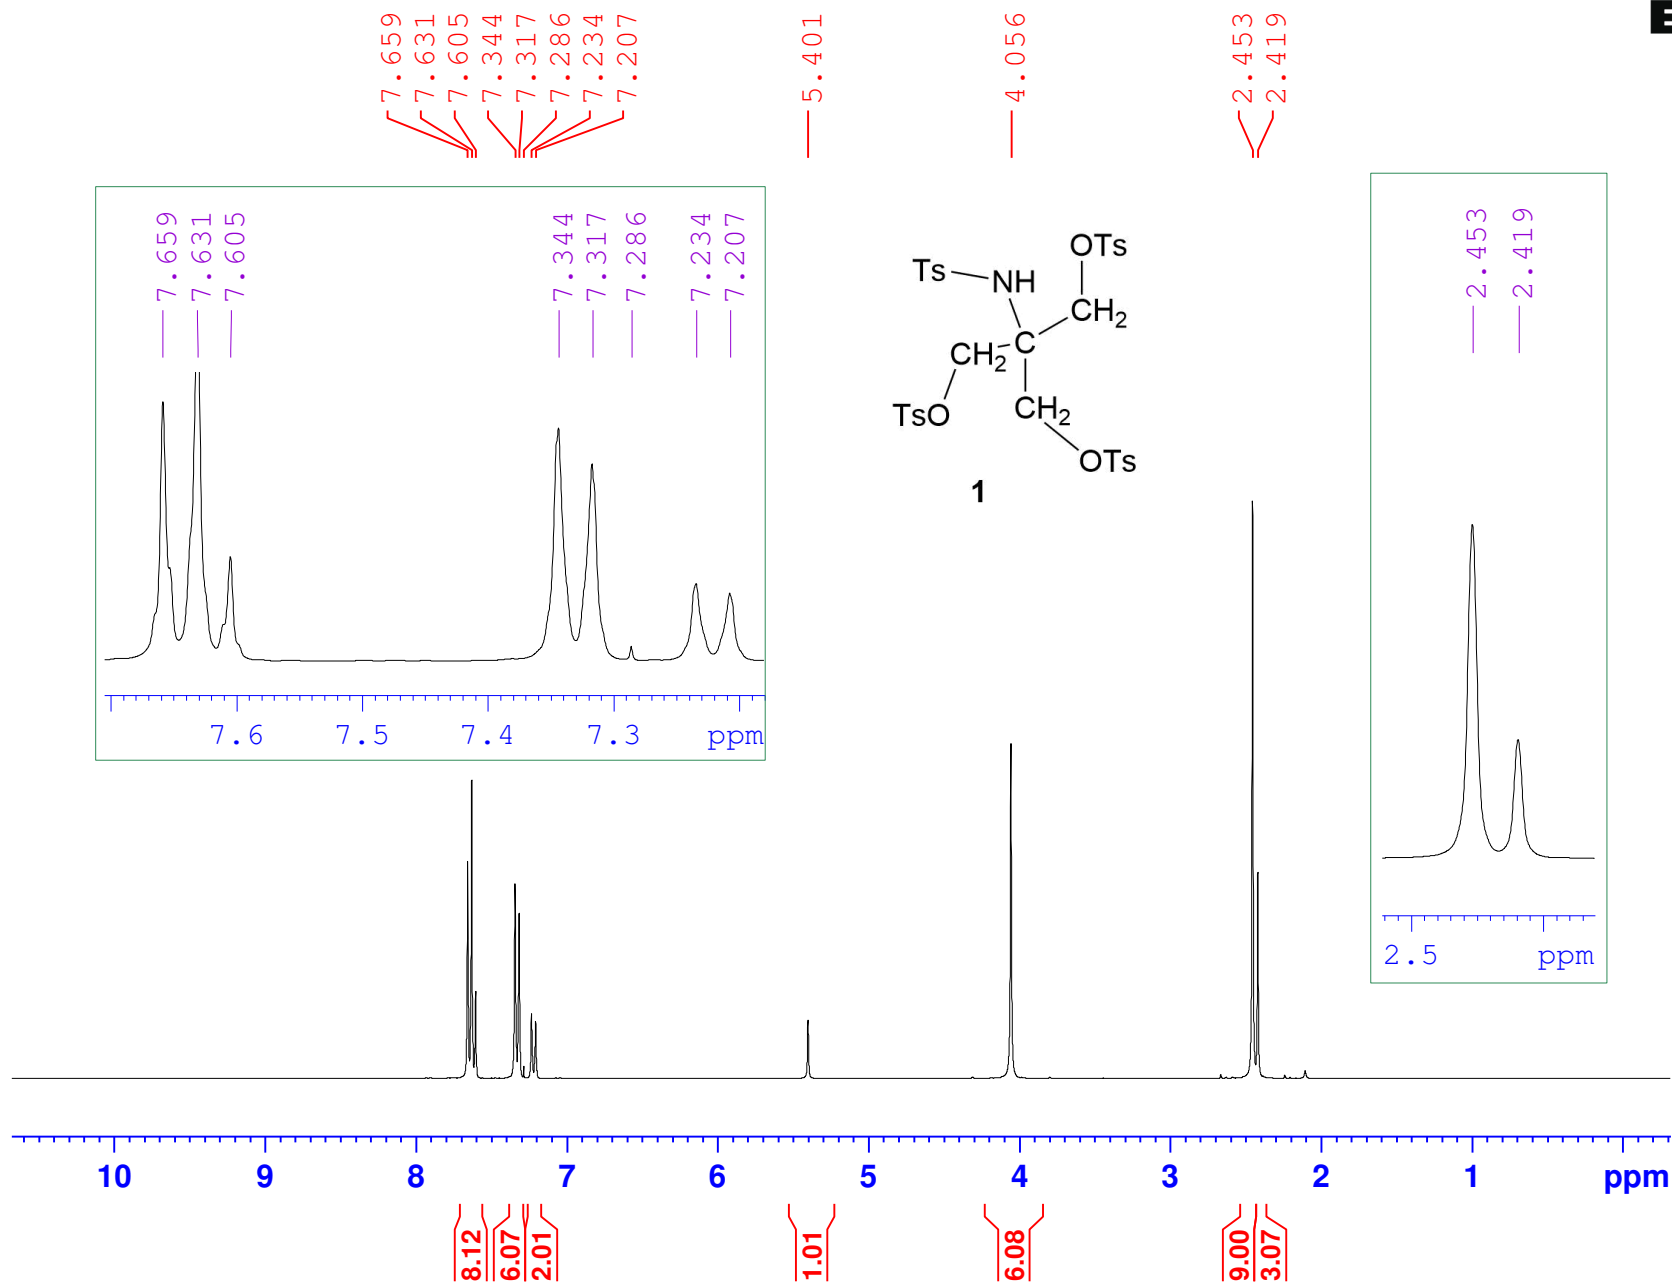

Current Data Parameters  
 NAME AA 1  
 EXPNO 1  
 PROCNO 1

F2 - Acquisition Parameters  
 Date\_ 20201207  
 Time 11.06  
 INSTRUM spect  
 PROBHD 5 mm PABBO BB/  
 PULPROG zg30  
 TD 65536  
 SOLVENT CDC13  
 NS 16  
 DS 2  
 SWH 6009.615 Hz  
 FIDRES 0.091699 Hz  
 AQ 5.4525952 sec  
 RG 32  
 DW 83.200 use  
 DE 6.50 use  
 TE 293.0 K  
 D1 1.00000000 sec  
 TD0 1

==== CHANNEL f1 =====  
 SFO1 300.1318534 MHz  
 NUC1 1H  
 P1 11.00 use  
 PLW1 19.00000000 W

F2 - Processing parameters  
 SI 65536  
 SF 300.1300000 MHz  
 WDW EM  
 SSB 0  
 LB 0.30 Hz  
 GB 0  
 PC 1.00

Figure S1: <sup>1</sup>H-NMR 1D spectrum of compound (1),

Supplementary Materials of 2-((4-methylphenyl)sulfonamido)-2-((tosyloxy) methyl) propane-1,3-diybis(4-methylbenzenesulfonate) (1)

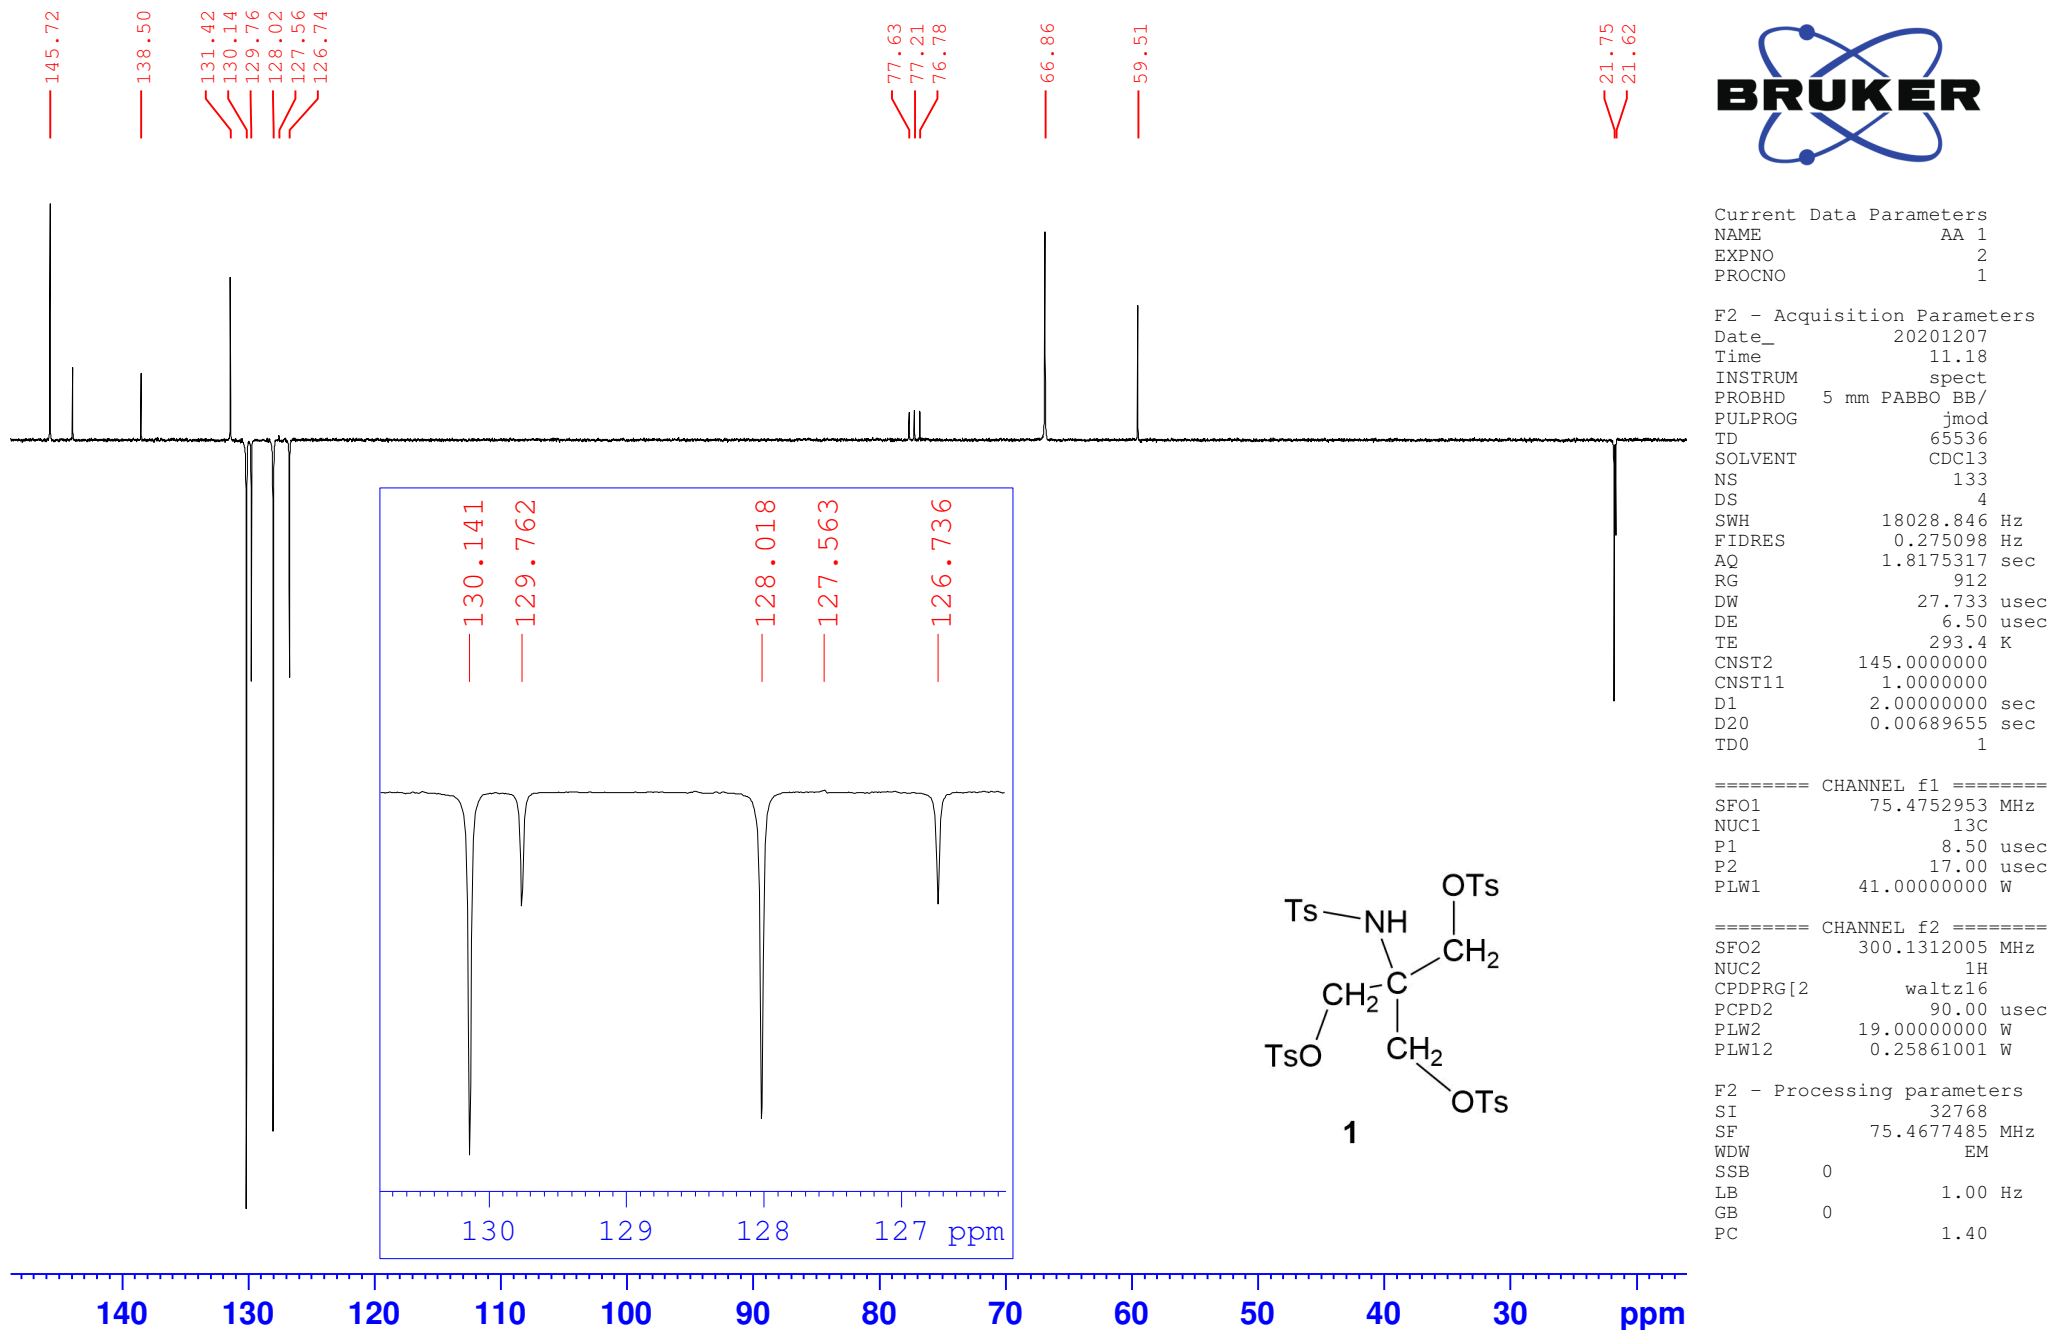

Figure S2: <sup>13</sup>C-NMR 1D spectrum of compound (1)

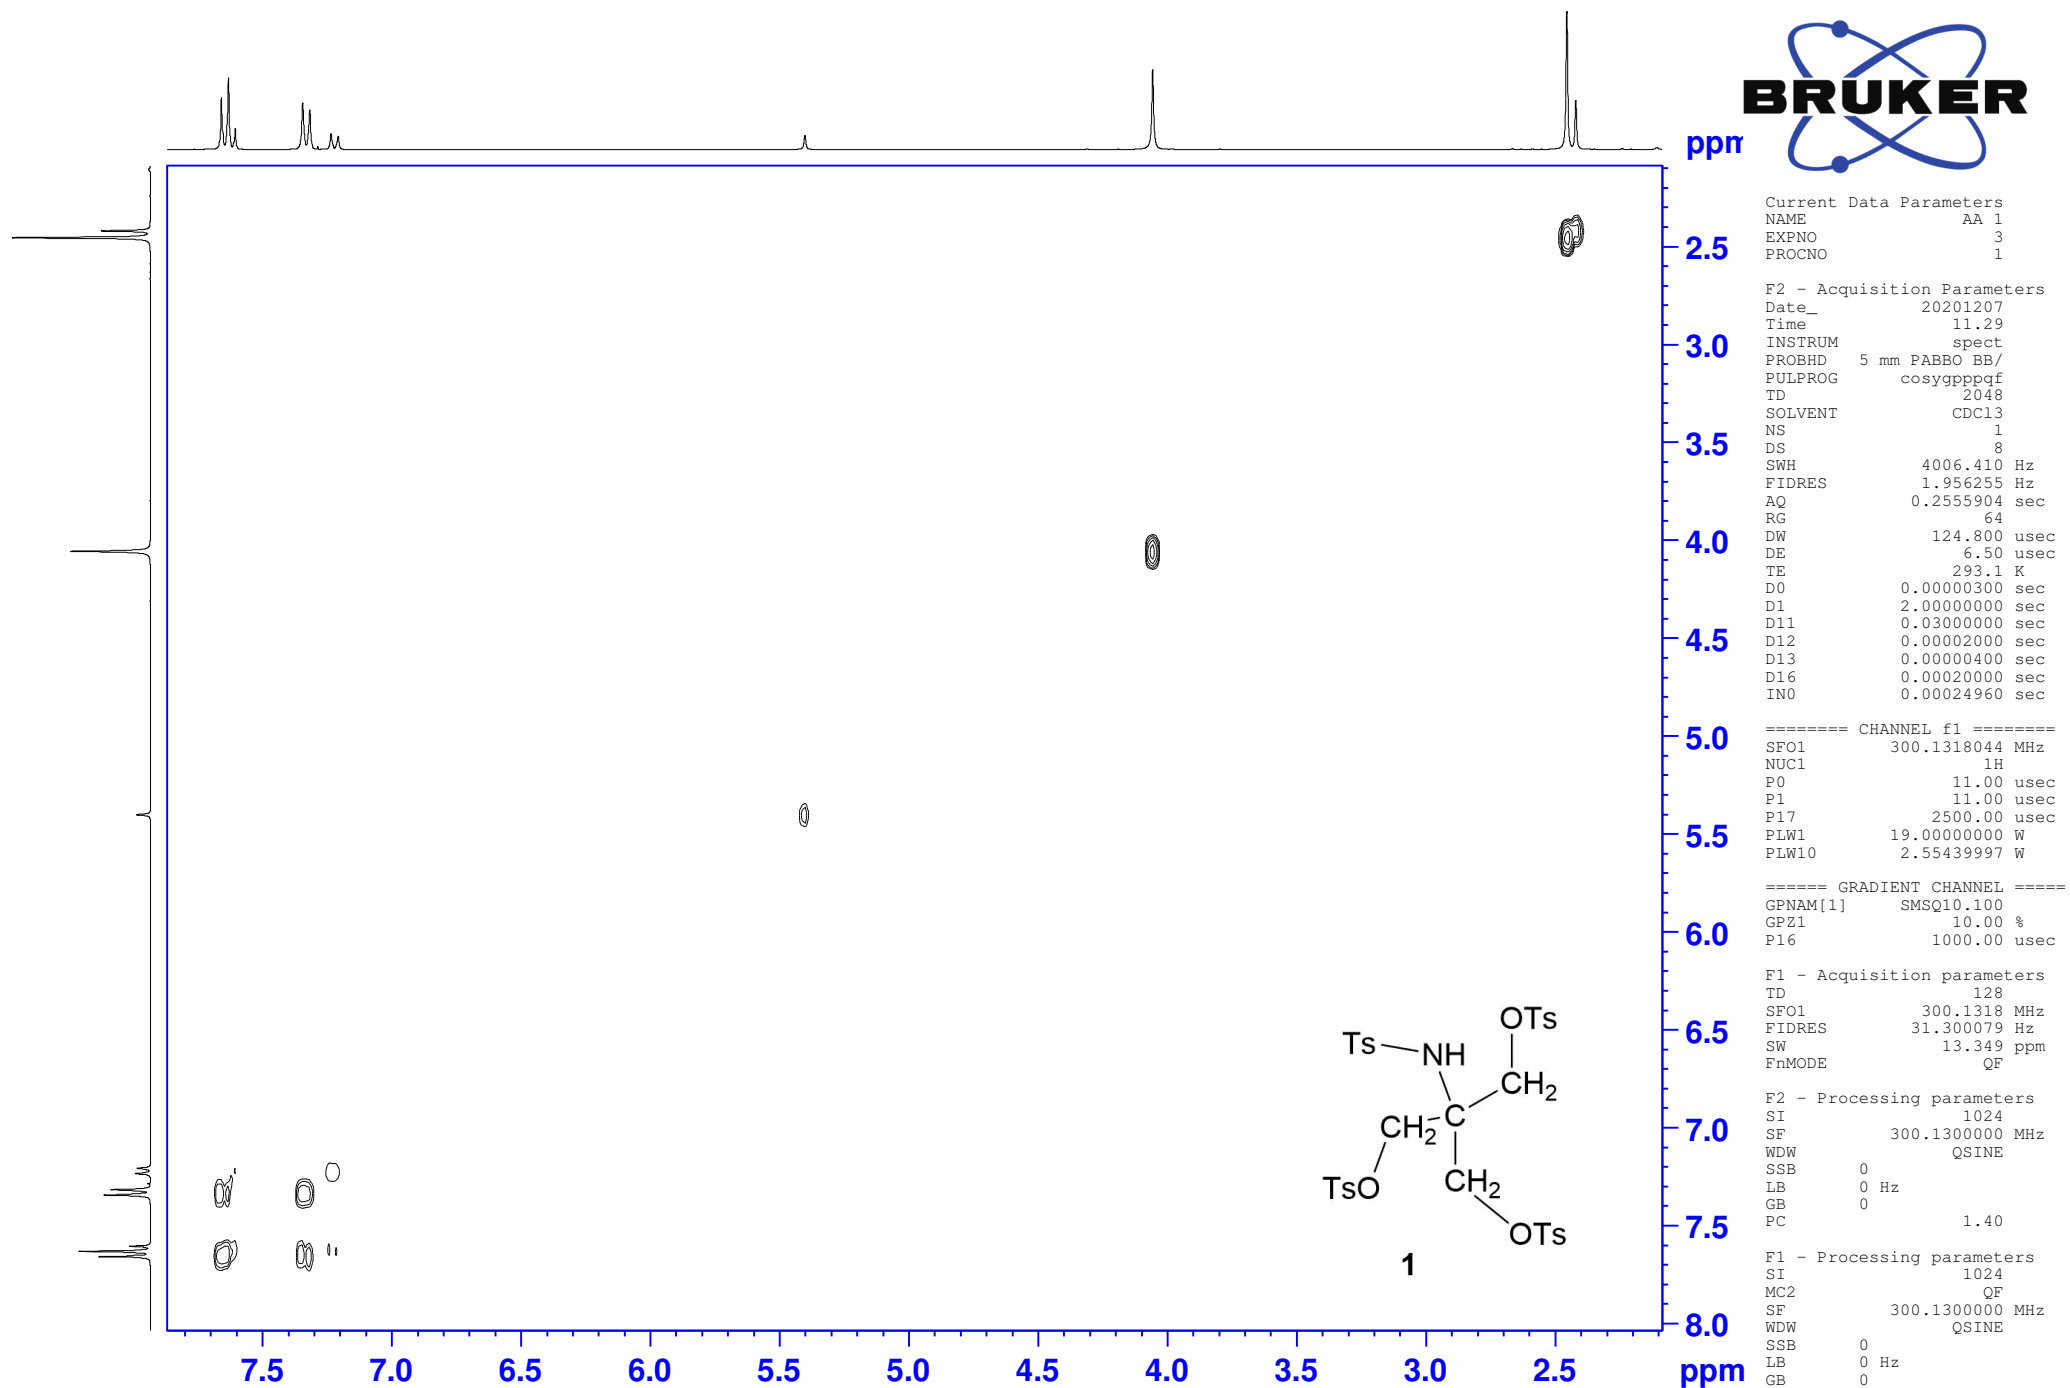

Figure S3: 2D COSY spectrum of compound (1)



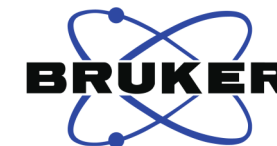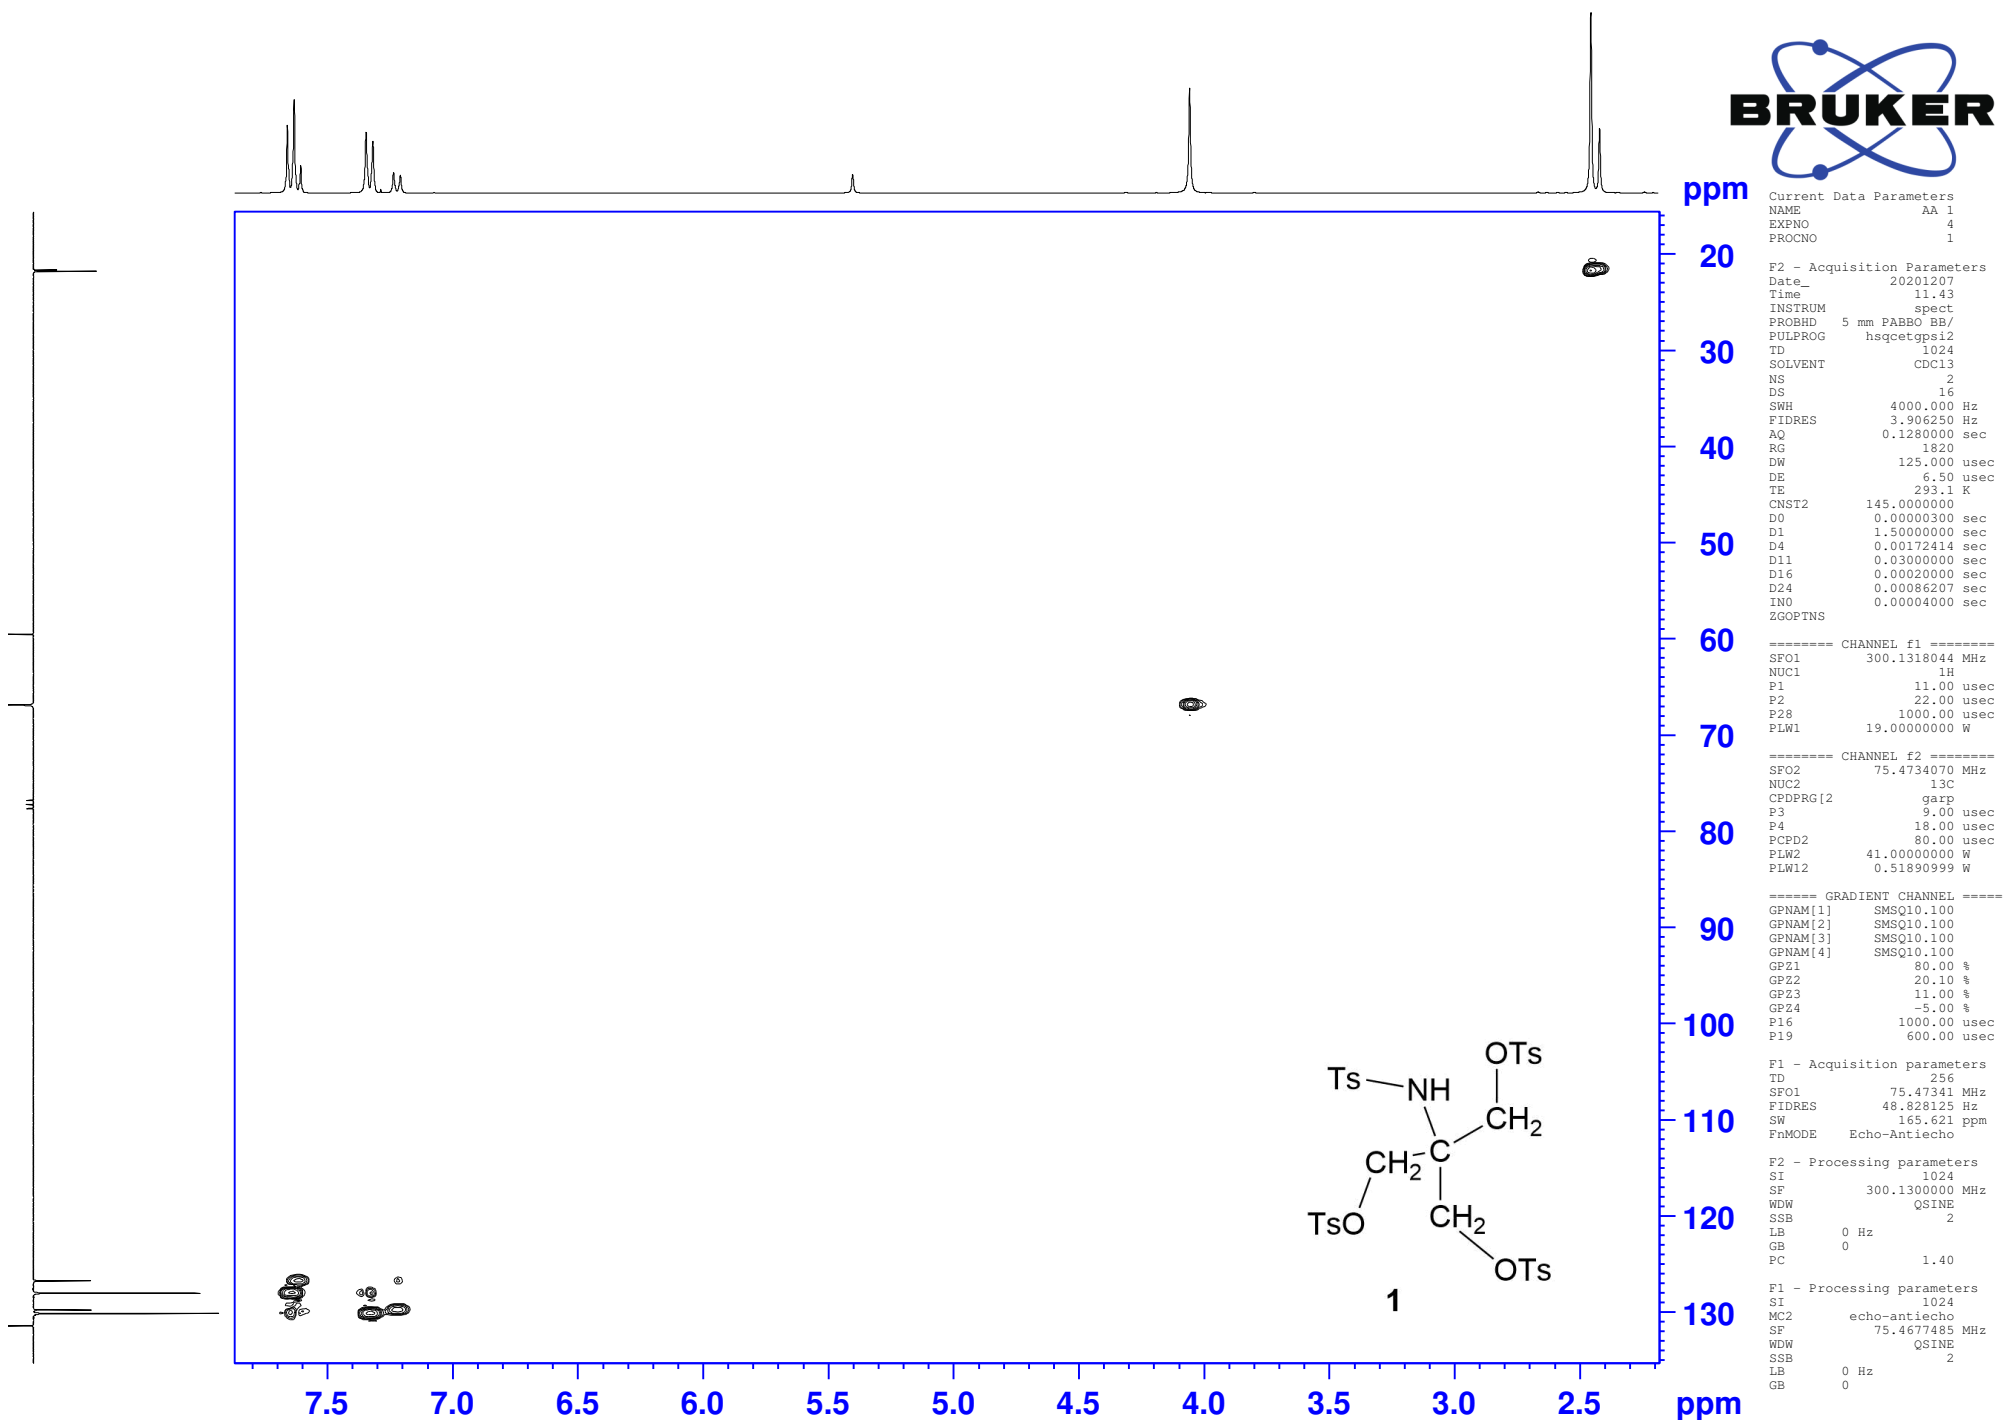

Figure S5: 2D HSQC spectrum of compound (1)

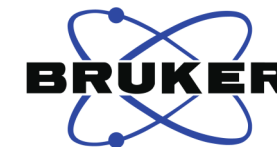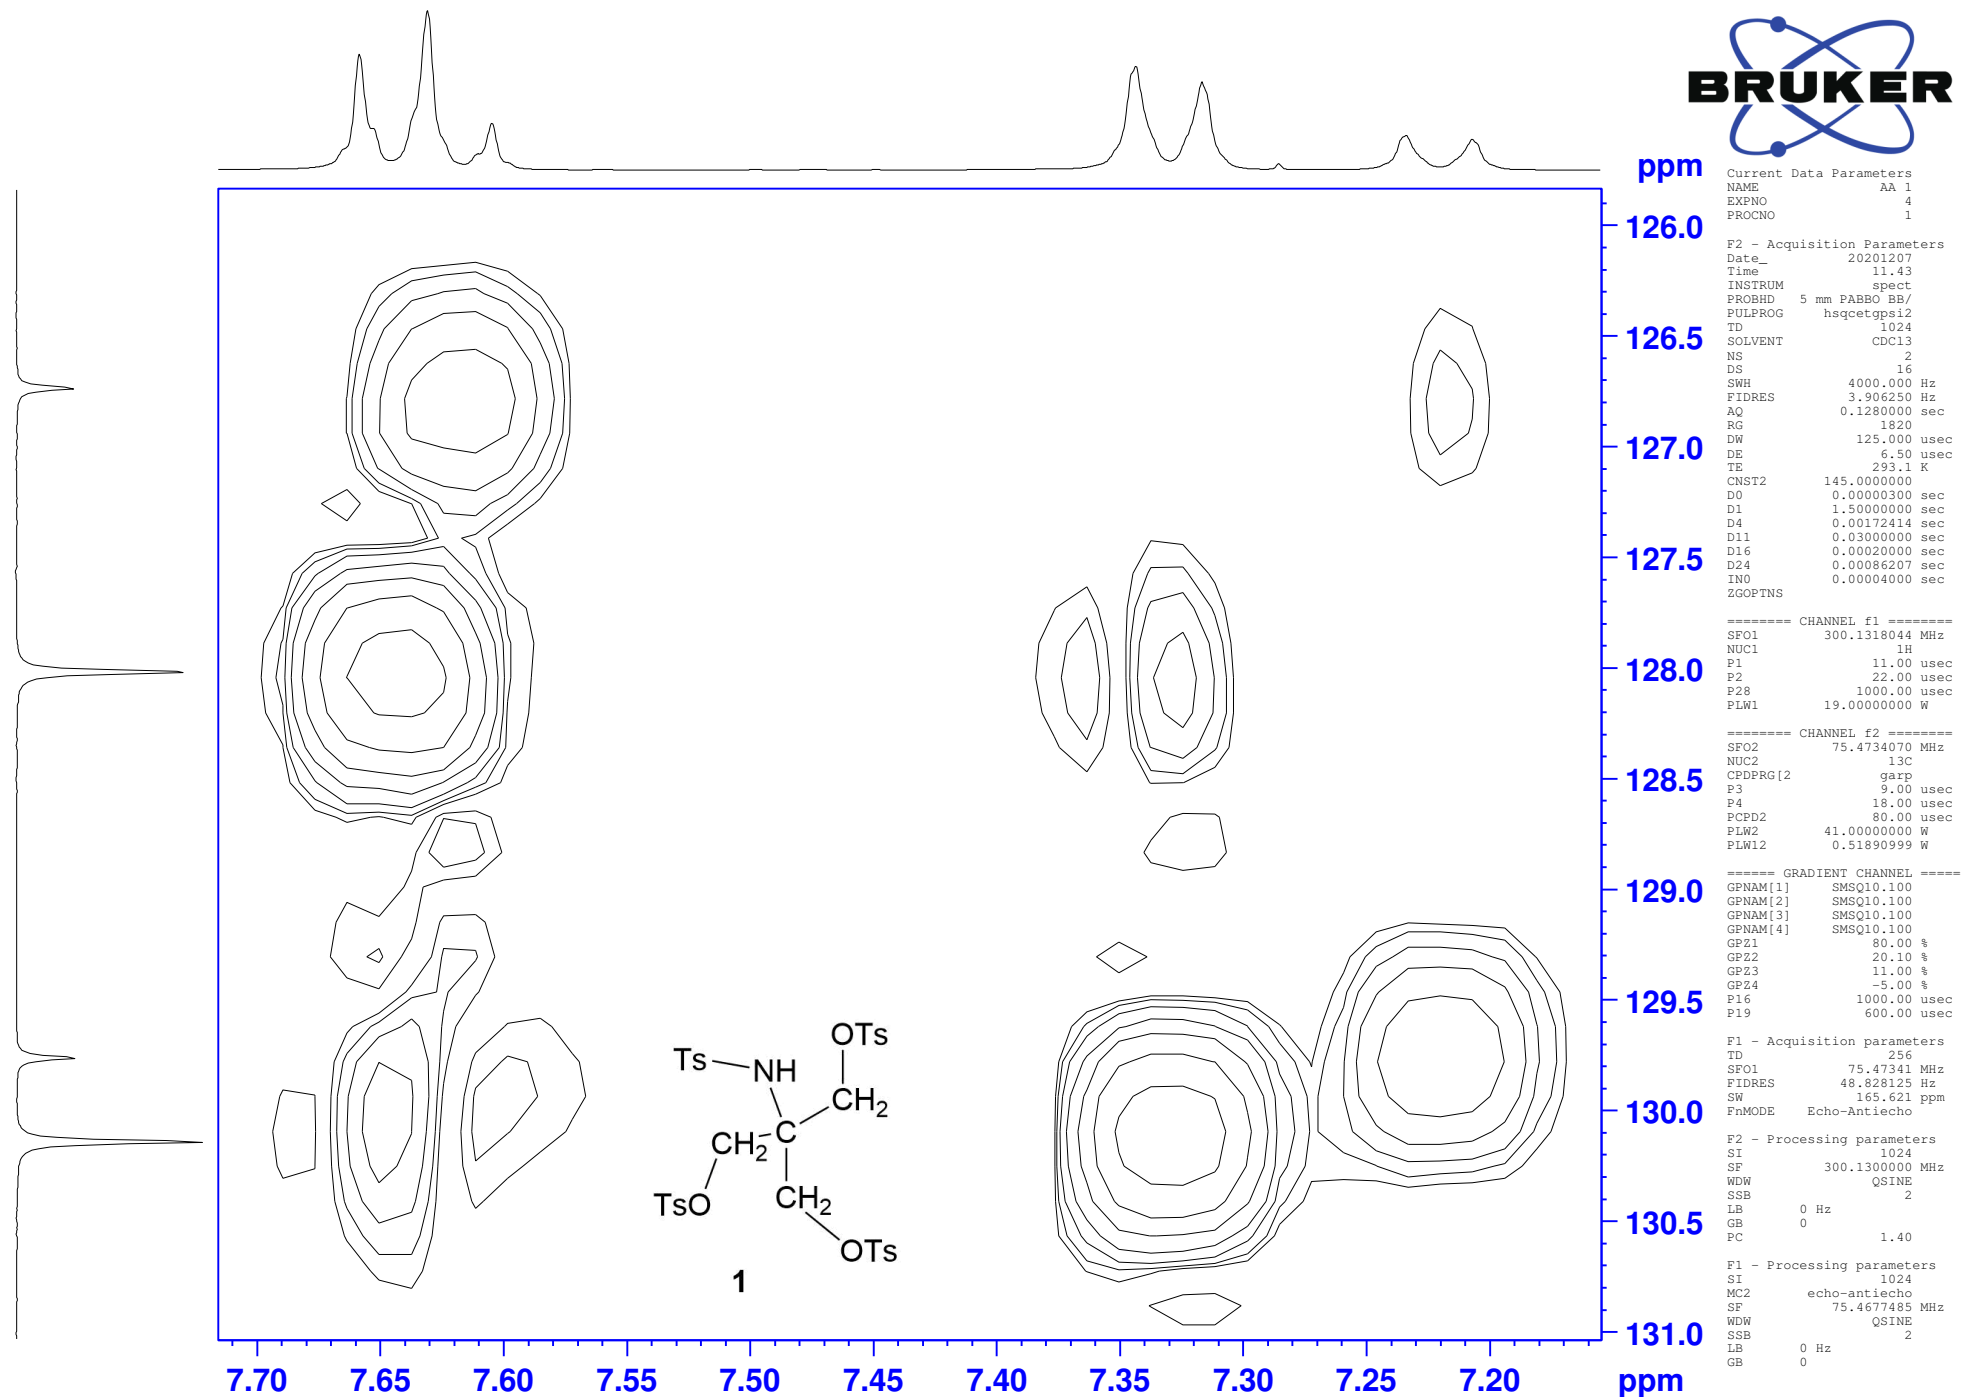

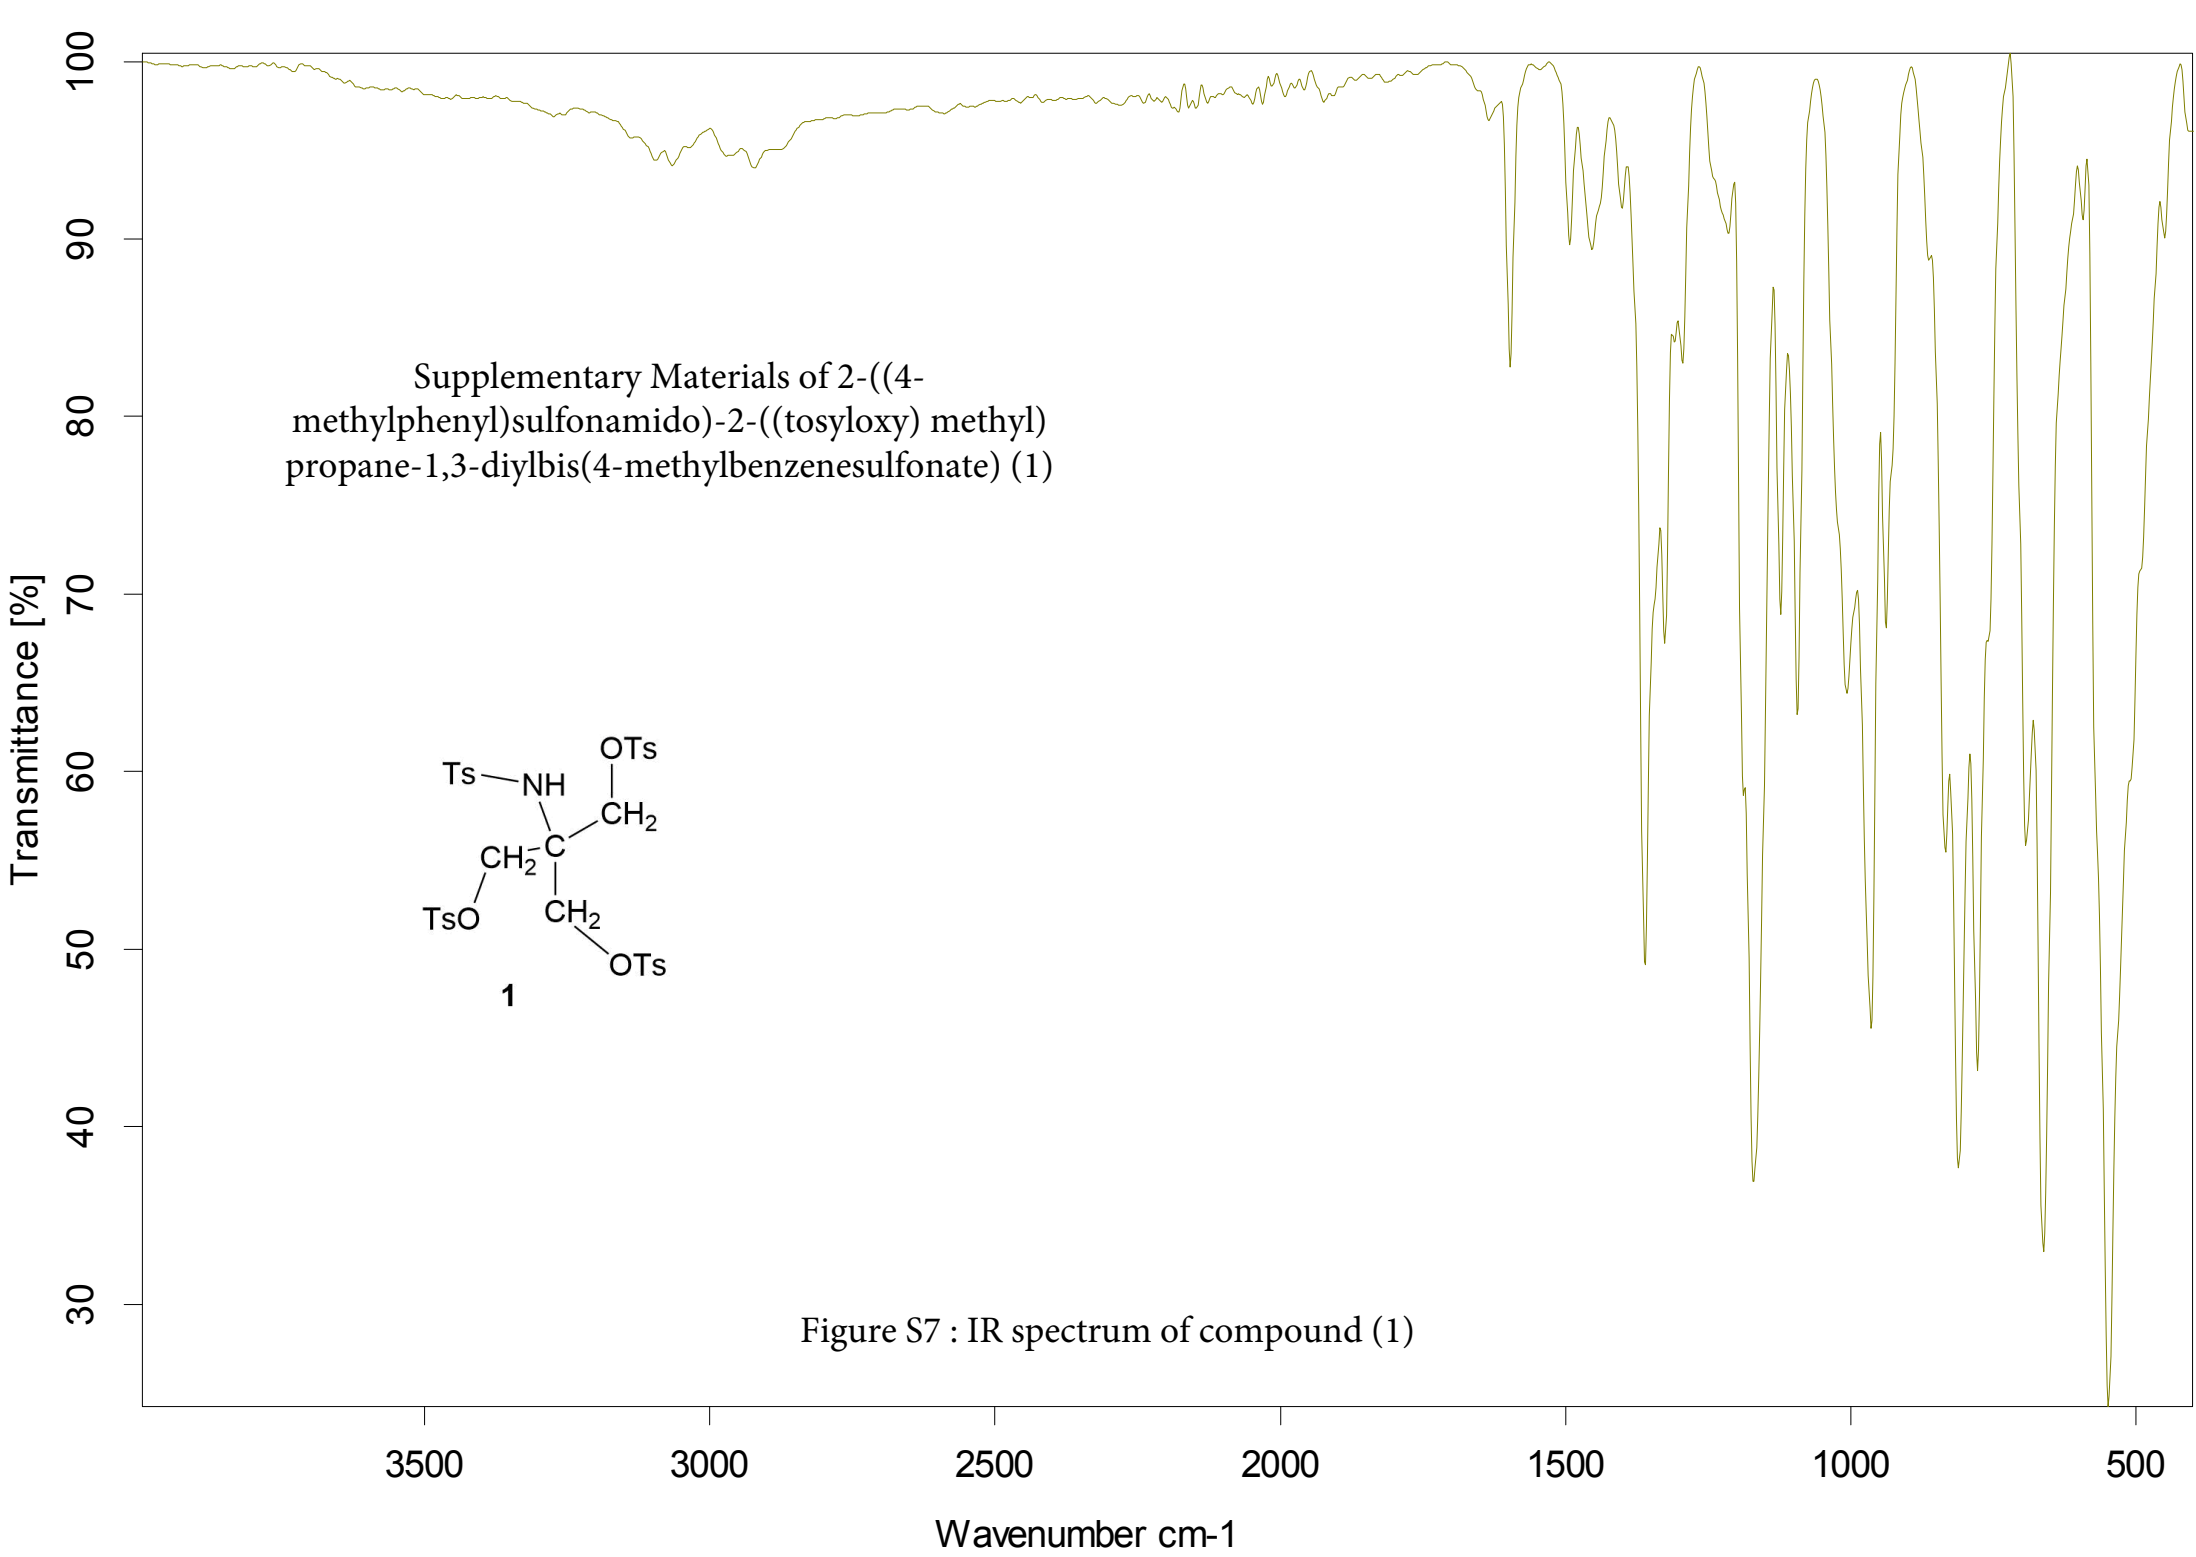

Supplementary Materials of N-(1,3-diazido-2-(azidomethyl)propan-2-yl)-4-methylbenzenesulfonamide (2)

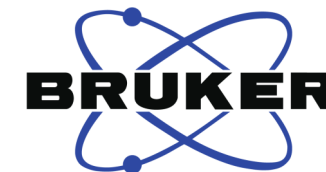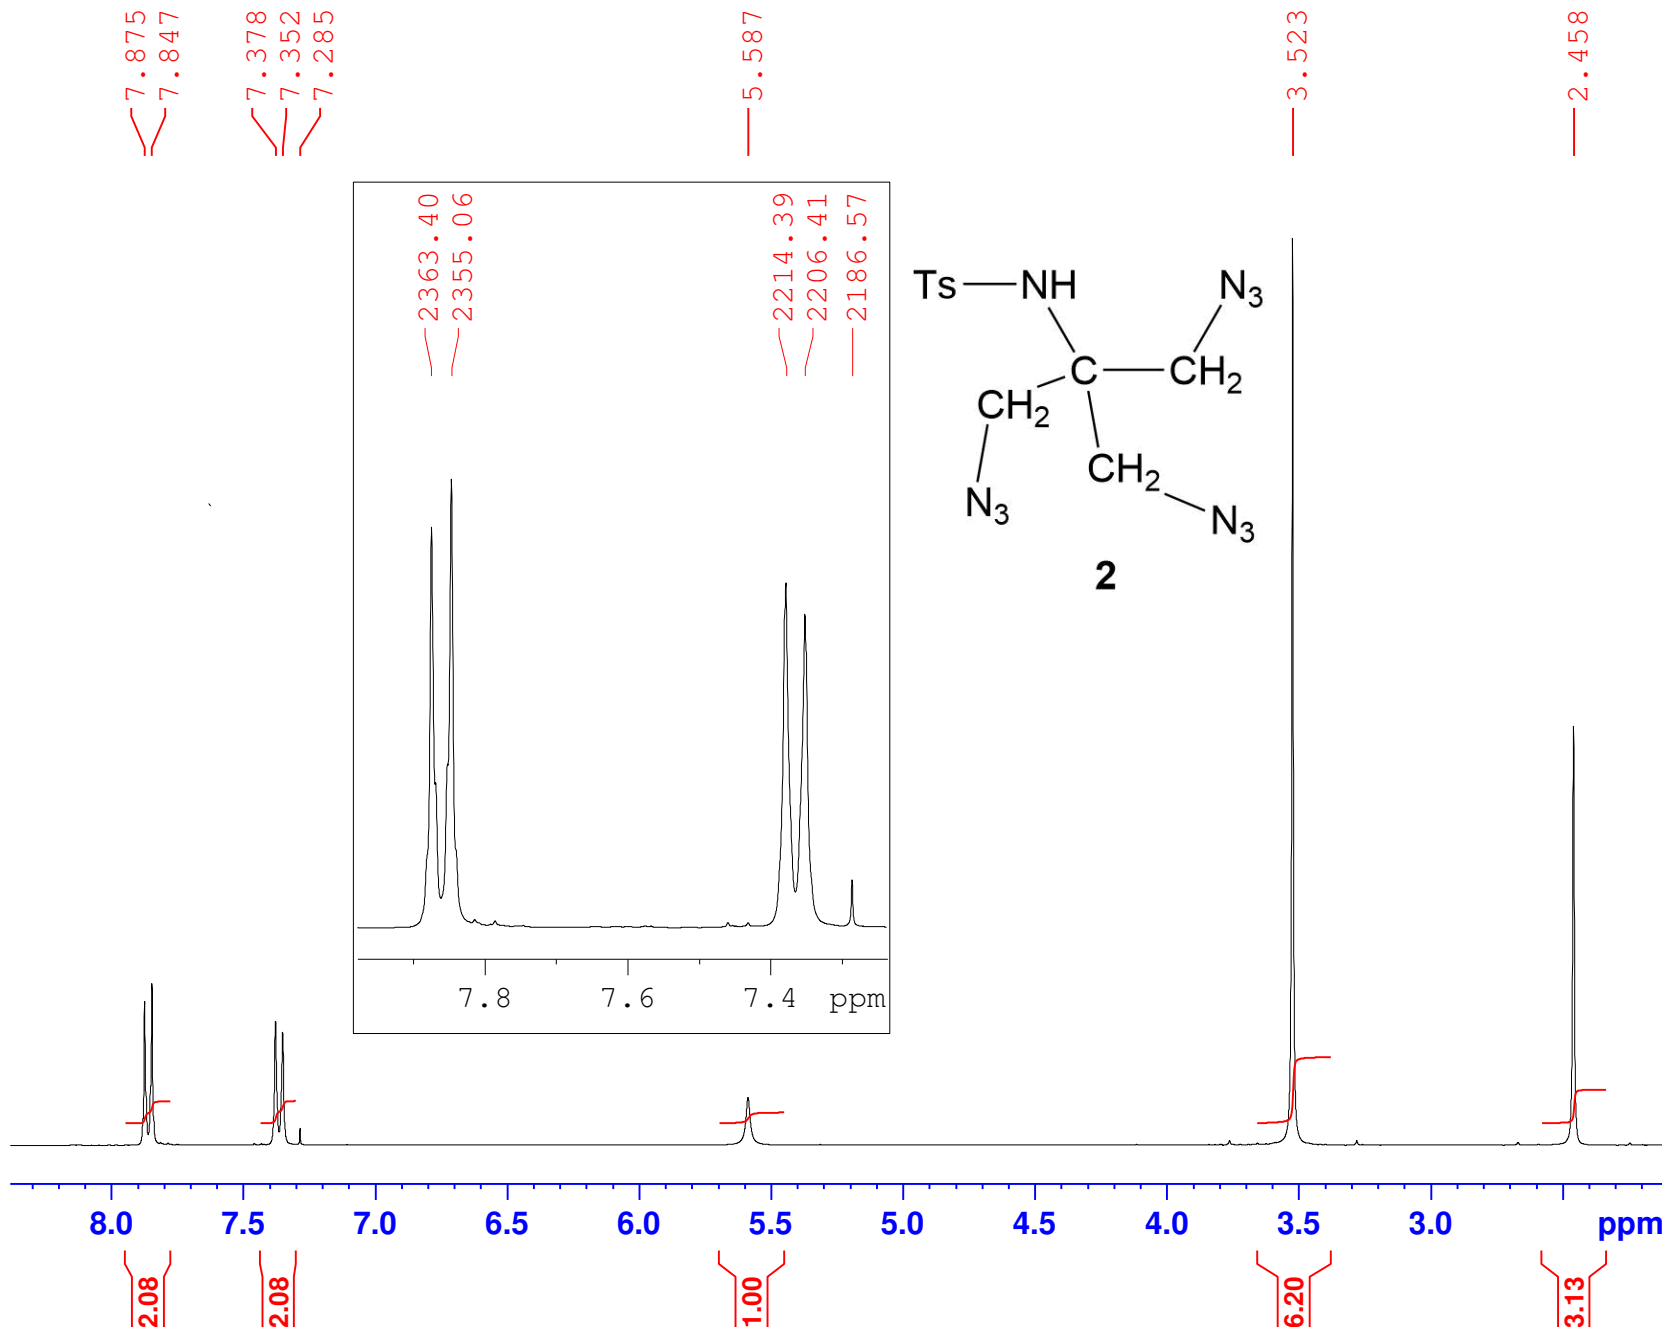

Current Data Parameters  
 NAME AA 2  
 EXPNO 1  
 PROCNO 1

F2 - Acquisition Parameters  
 Date\_ 20201203  
 Time 11.00  
 INSTRUM spect  
 PROBHD 5 mm PABBO BB/  
 PULPROG zg30  
 TD 65536  
 SOLVENT CDCl3  
 NS 16  
 DS 2  
 SWH 6009.615 Hz  
 FIDRES 0.091699 Hz  
 AQ 5.4525952 sec  
 RG 57  
 DW 83.200 usec  
 DE 6.50 usec  
 TE 294.3 K  
 D1 1.00000000 sec  
 TD0 1

===== CHANNEL f1 =====  
 SFO1 300.1318534 MHz  
 NUC1 1H  
 P1 11.00 usec  
 PLW1 19.00000000 W

F2 - Processing parameters  
 SI 65536  
 SF 300.1300000 MHz  
 WDW EM  
 SSB 0  
 LB 0.30 Hz  
 GB 0  
 PC 1.00

Figure S8: <sup>1</sup>H-NMR 1D spectrum of compound (2),



Supplementary Materials of N-(1,3-diazido-2-(azidomethyl)propan-2-yl)-4-methylbenzenesulfonamide (2)

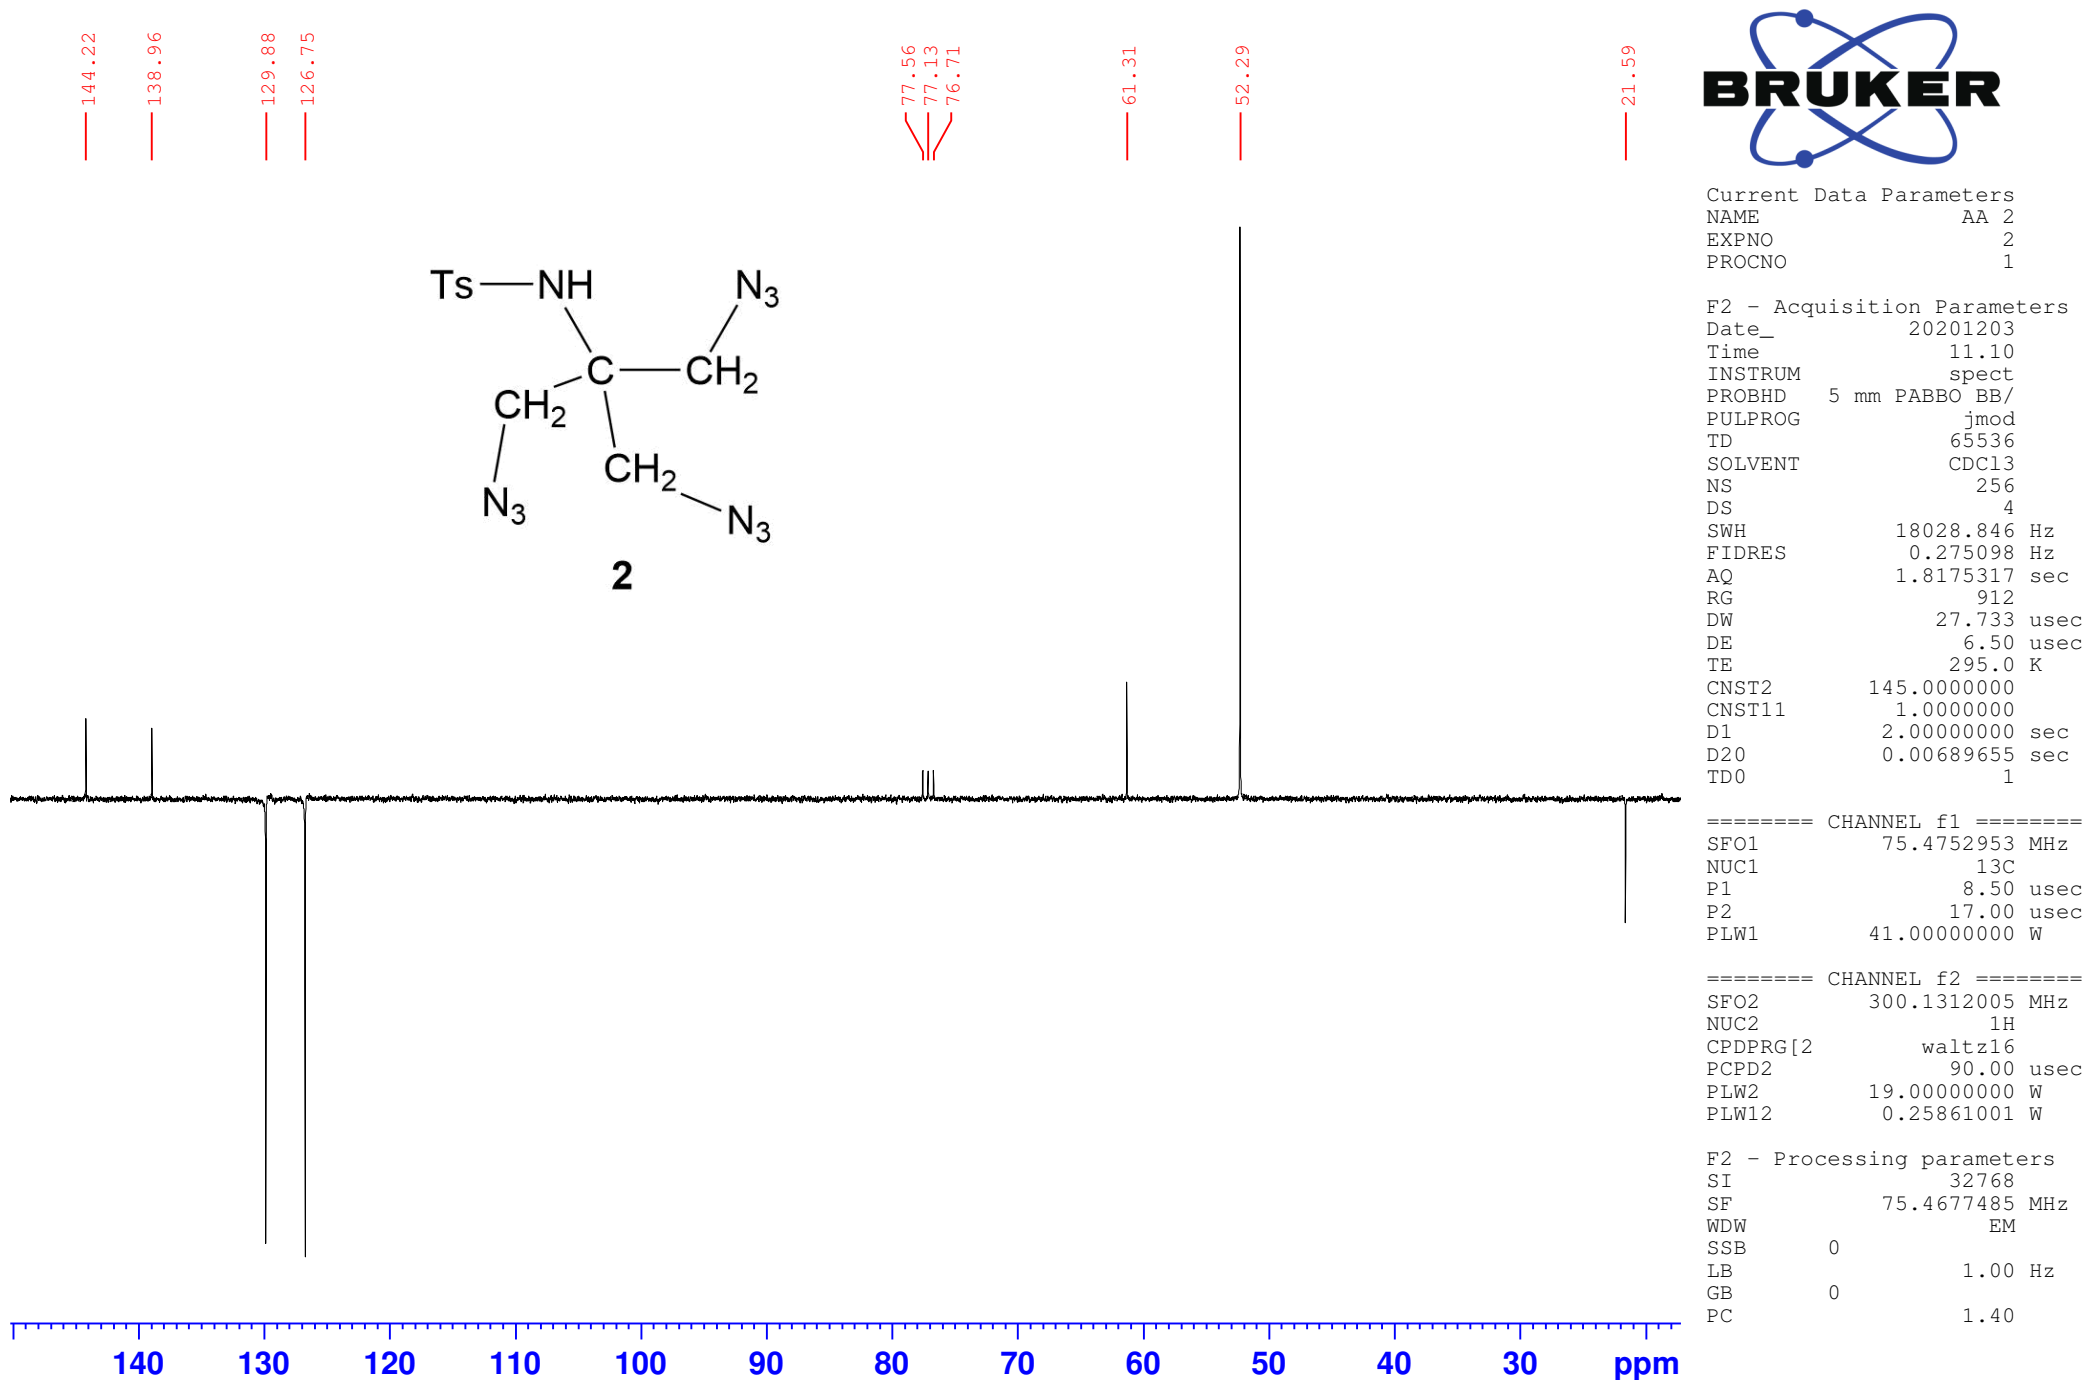

Figure S9: <sup>13</sup>C-NMR 1D spectrum of compound (2)

Supplementary Materials of N-(1,3-diazido-2-(azidomethyl)propan-2-yl)-4-methylbenzenesulfonamide (2)

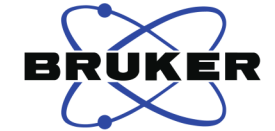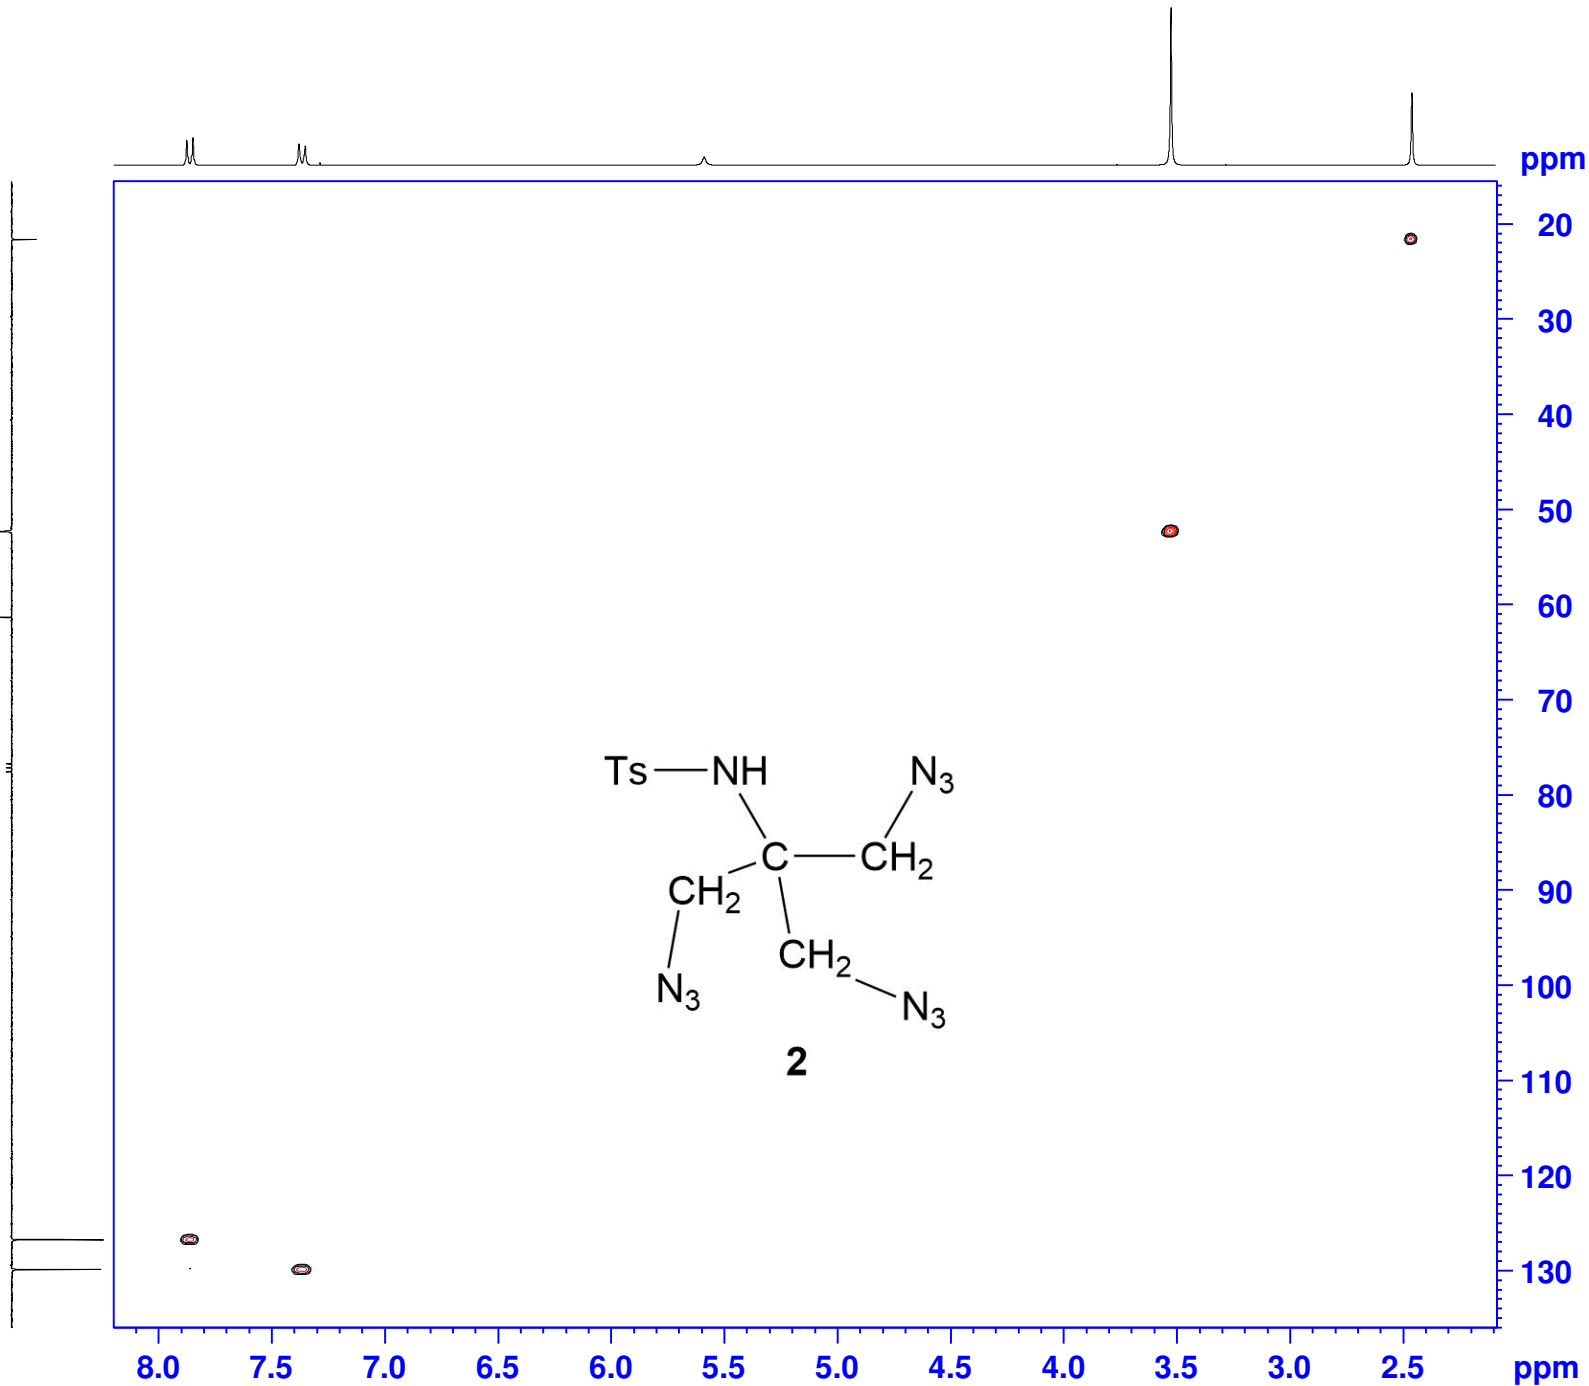

```

Current Data Parameters
NAME          AA 2
EXPNO         4
PROCNO        1

F2 - Acquisition Parameters
Date_         20201203
Time          11.54
INSTRUM       spect
PROBHD        5 mm PABBO BB/
PULPROG       hsqcetgpsi2
TD            1024
SOLVENT       CDC13
NS            2
DS            16
SWH           4000.000 Hz
FIDRES        3.906250 Hz
AQ            0.1280000 sec
RG            2050
DW            125.000 usec
DE            6.50 usec
TE            294.4 K
CNST2         145.0000000
D0            0.00000300 sec
D1            1.50000000 sec
D4            0.00172414 sec
D11           0.03000000 sec
D16           0.00020000 sec
D24           0.00086207 sec
IN0           0.00004000 sec
ZGOPTNS

===== CHANNEL f1 =====
SFO1          300.1318044 MHz
NUC1           1H
P1            11.00 usec
P2            22.00 usec
P28           1000.00 usec
PLW1          19.00000000 W

===== CHANNEL f2 =====
SFO2          75.4734070 MHz
NUC2           13C
CPDPRG[2]     garp
P3            9.00 usec
P4            18.00 usec
PCPD2         80.00 usec
PLW2          41.00000000 W
PLW12         0.51890999 W

===== GRADIENT CHANNEL =====
GPNAM[1]      SMSQ10.100
GPNAM[2]      SMSQ10.100
GPNAM[3]      SMSQ10.100
GPNAM[4]      SMSQ10.100
GPZ1          80.00 %
GPZ2          20.10 %
GPZ3          11.00 %
GPZ4          -5.00 %
P16           1000.00 usec
P19           600.00 usec

F1 - Acquisition parameters
TD            256
SFO1          75.47341 MHz
FIDRES        48.828125 Hz
SW            165.621 ppm
FnMODE        Echo-Antiecho

F2 - Processing parameters
SI            1024
SF            300.1300000 MHz
WDW           QSINE
SSB           2
LB            0 Hz
GB            0
PC            1.40

F1 - Processing parameters
SI            1024
MC2           echo-antiecho
SF            75.4677485 MHz
WDW           QSINE
SSB           2
LB            0 Hz
GB            0
    
```

Figure S10: 2D COSY spectrum of compound (2)

Supplementary Materials of N-(1,3-diazido-2-(azidomethyl)propan-2-yl)-4-methylbenzenesulfonamide (2)

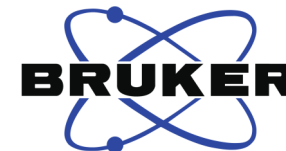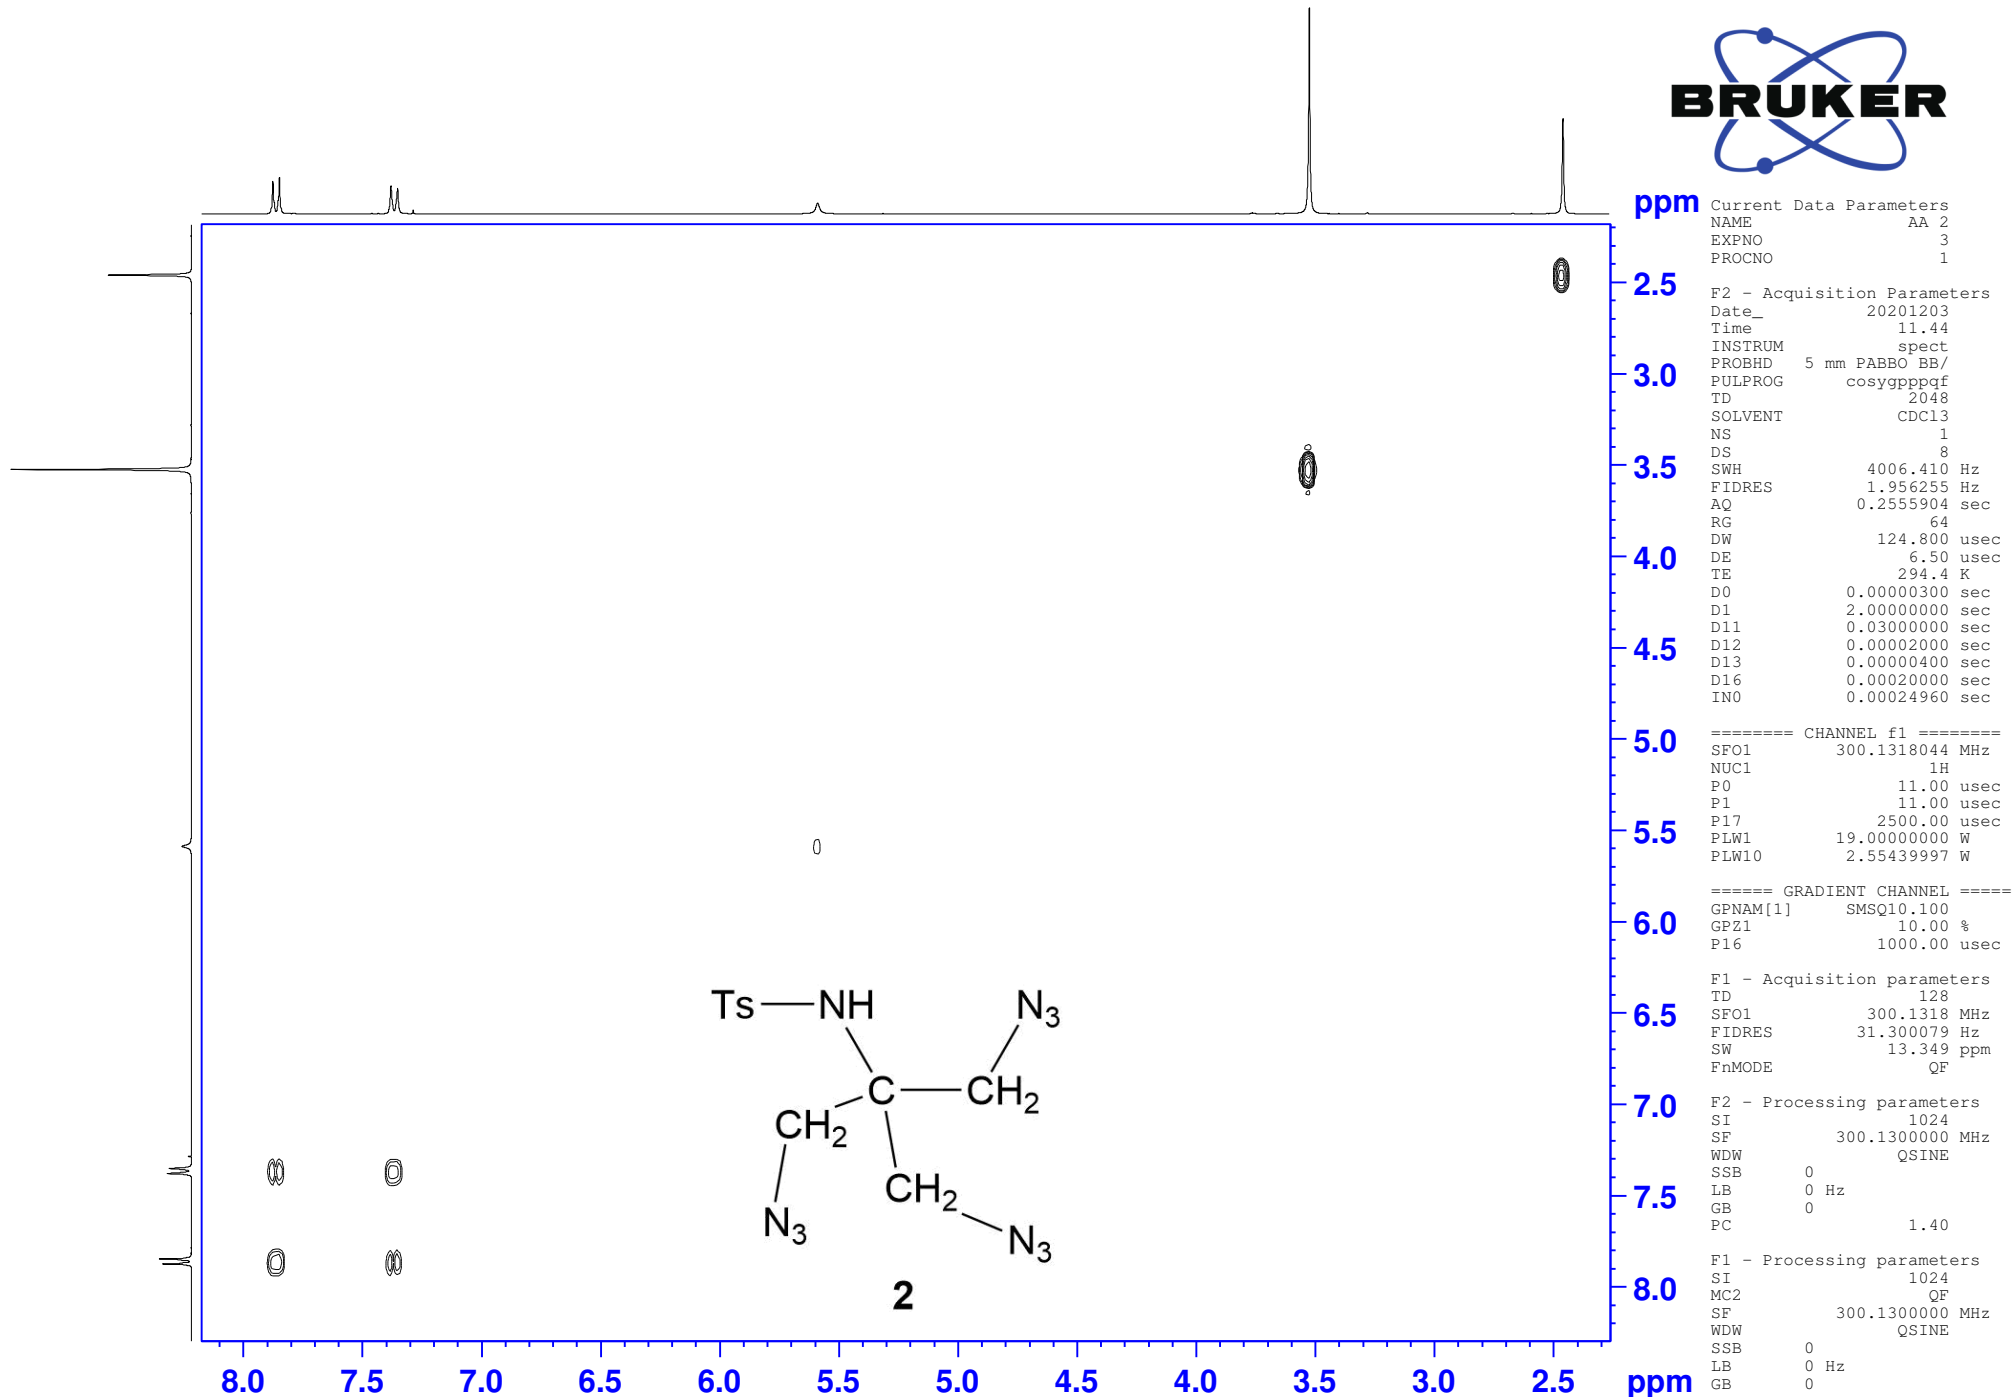

Figure S11: 2D HSQC spectrum of compound (2)

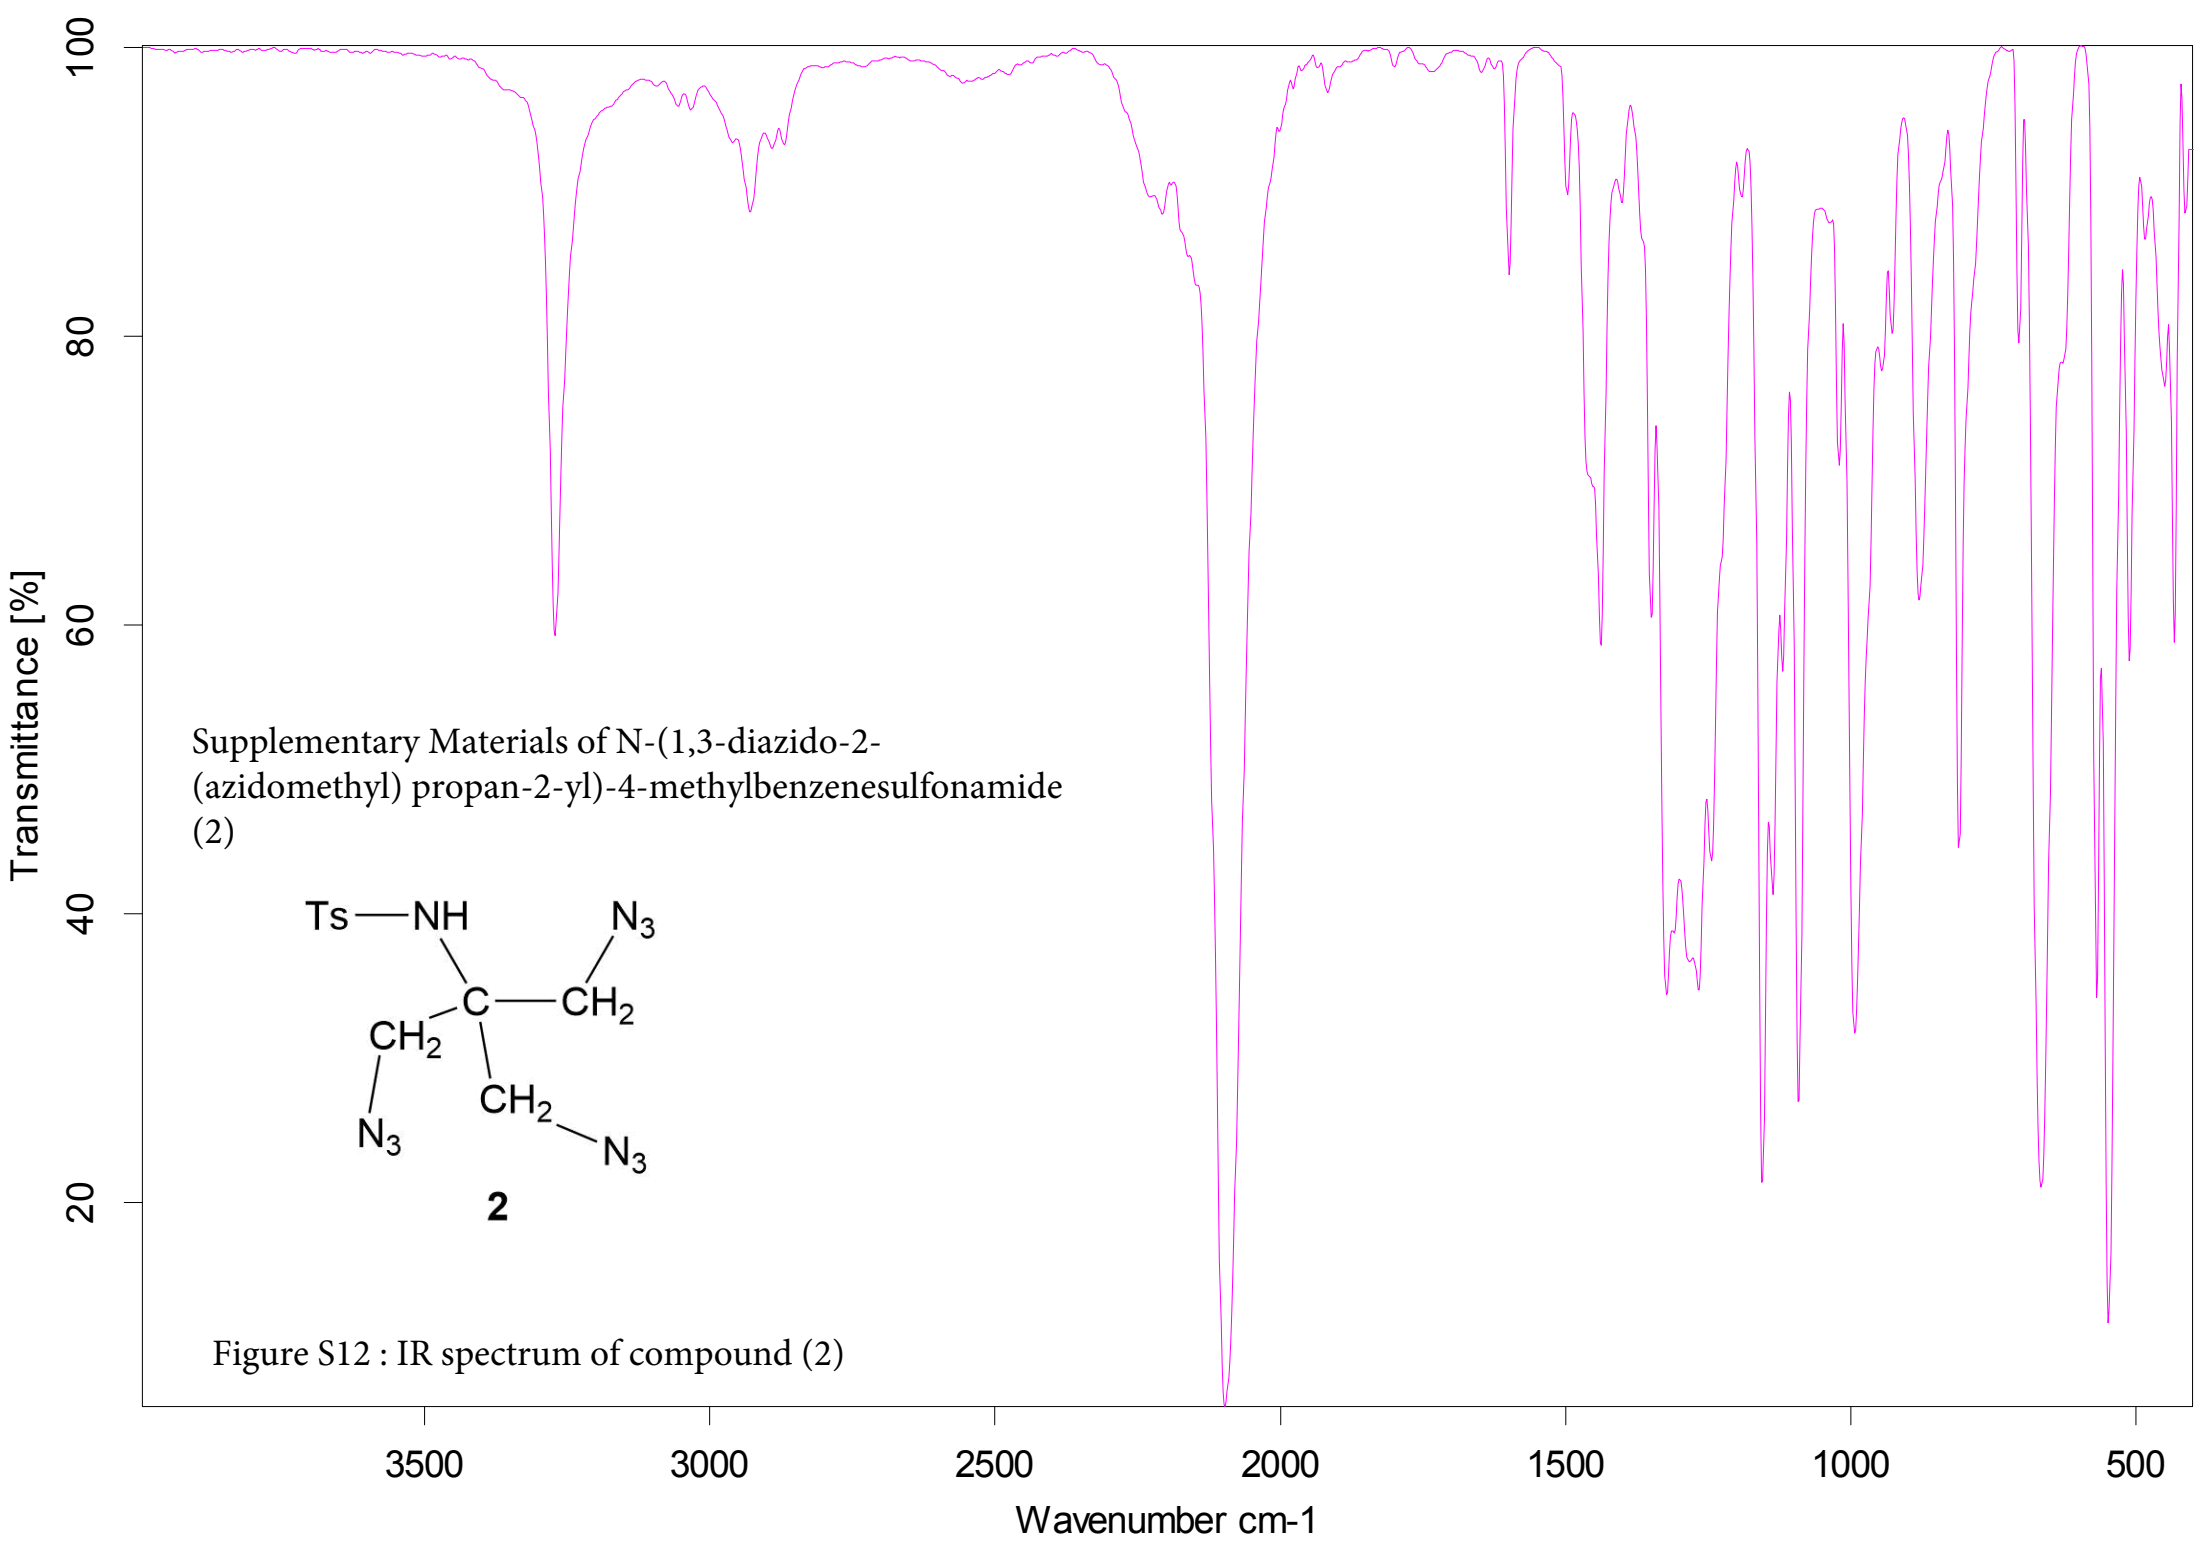

Supplementary Materials of tetramethyl 1,1'-(2-((4,5-bis(methoxycarbonyl)-1H-1,2,3-triazol-1-yl)methyl)-2-((4-methylphenyl) sulfonamido)propane-1,3-diyl)bis(1H-1,2,3-triazole-4,5-dicarboxylate)

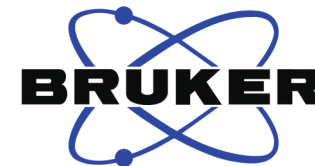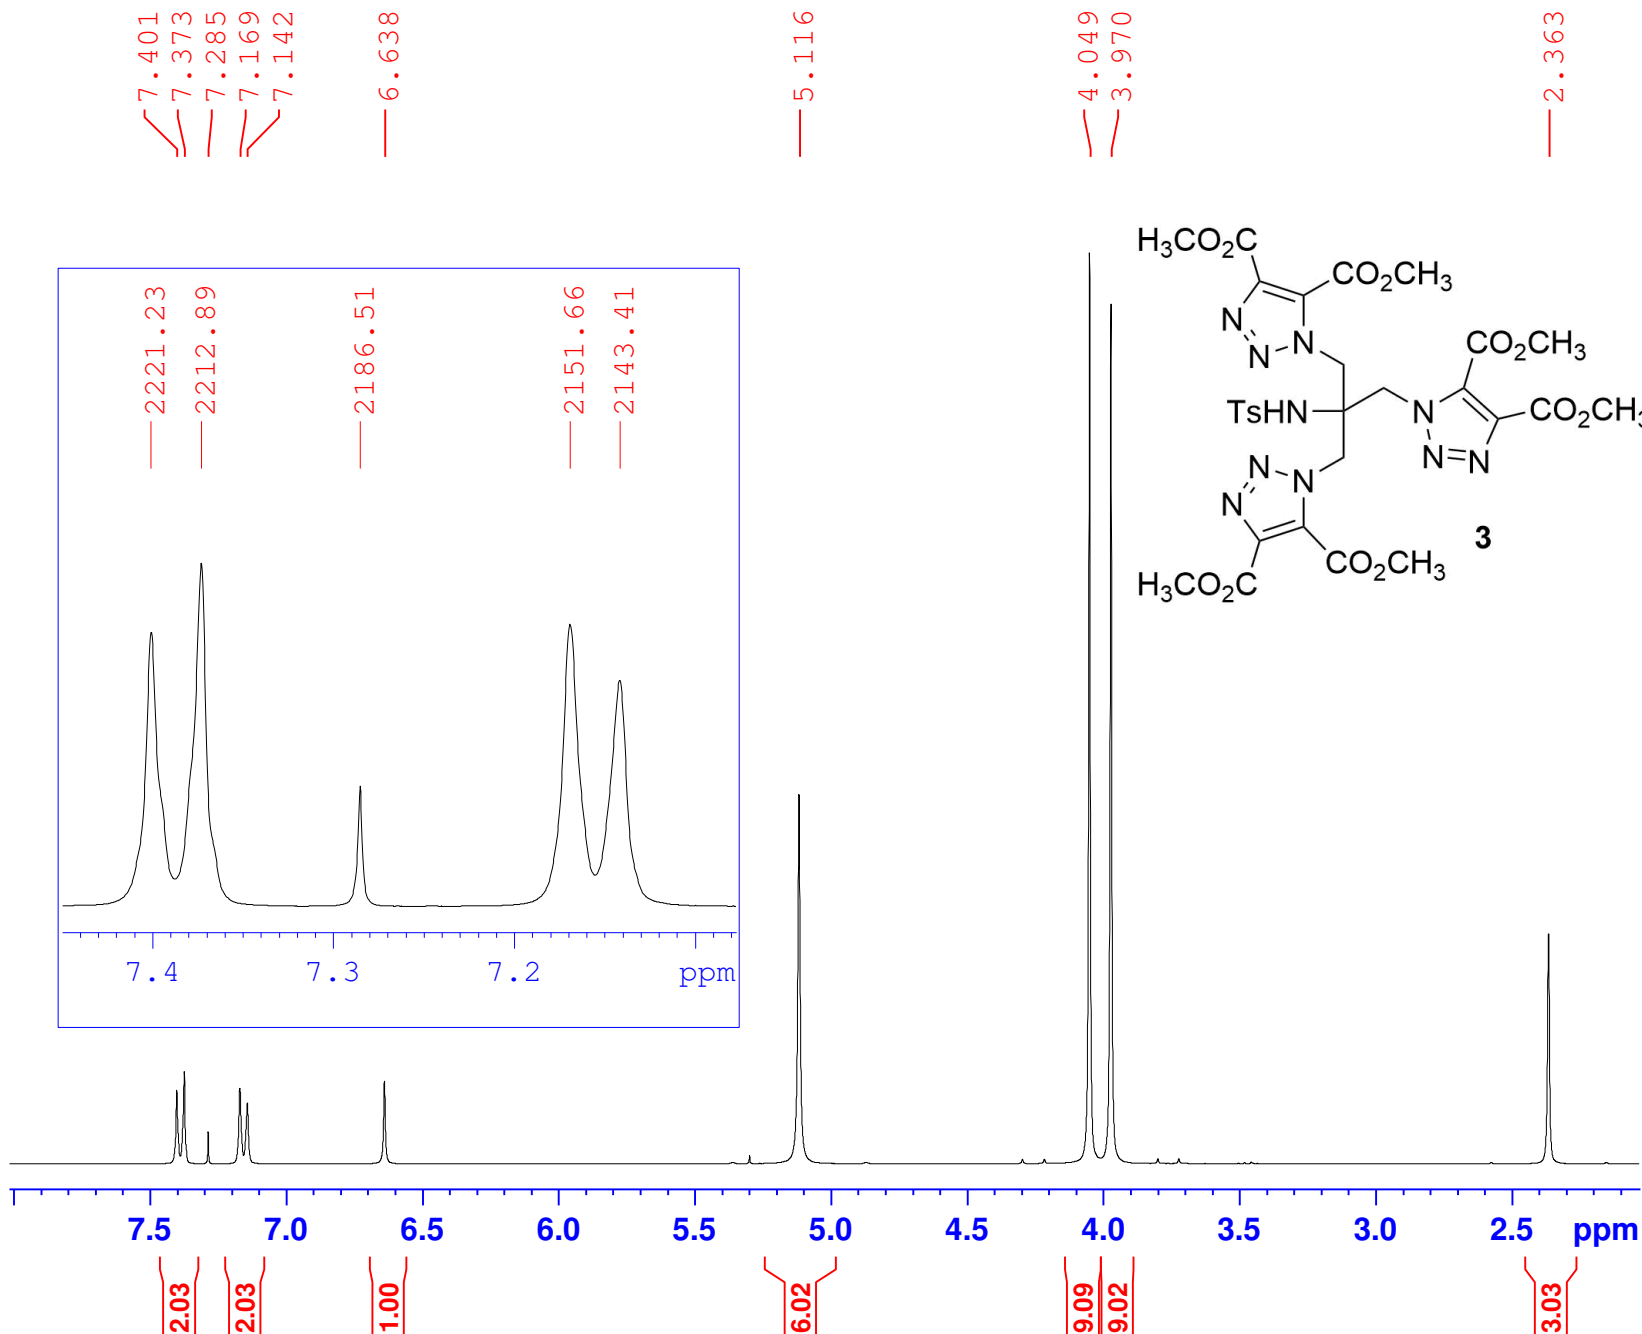

Current Data Parameters  
NAME AA 3  
EXPNO 1  
PROCNO 1

F2 - Acquisition Parameters  
Date\_ 20201203  
Time 9.58  
INSTRUM spect  
PROBHD 5 mm PABBO BB/  
PULPROG zg30  
TD 65536  
SOLVENT CDC13  
NS 16  
DS 2  
SWH 6009.615 Hz  
FIDRES 0.091699 Hz  
AQ 5.4525952 sec  
RG 80.6  
DW 83.200 usec  
DE 6.50 usec  
TE 293.9 K  
D1 1.0000000 sec  
TD0 1

===== CHANNEL f1 =====  
SFO1 300.1318534 MHz  
NUC1 1H  
P1 11.00 usec  
PLW1 19.00000000 W

F2 - Processing parameters  
SI 65536  
SF 300.1300000 MHz  
WDW EM  
SSB 0  
LB 0.30 Hz  
GB 0  
PC 1.00

Figure S13: <sup>1</sup>H-NMR 1D spectrum of compound (3)

Supplementary Materials of tetramethyl 1,1'-(2-((4,5-bis(methoxycarbonyl)-1H-1,2,3-triazol-1-yl)methyl)-2-((4-methylphenyl) sulfonamido)propane-1,3-diyl)bis(1H-1,2,3-triazole-4,5-dicarboxylate)

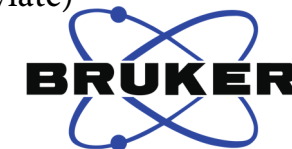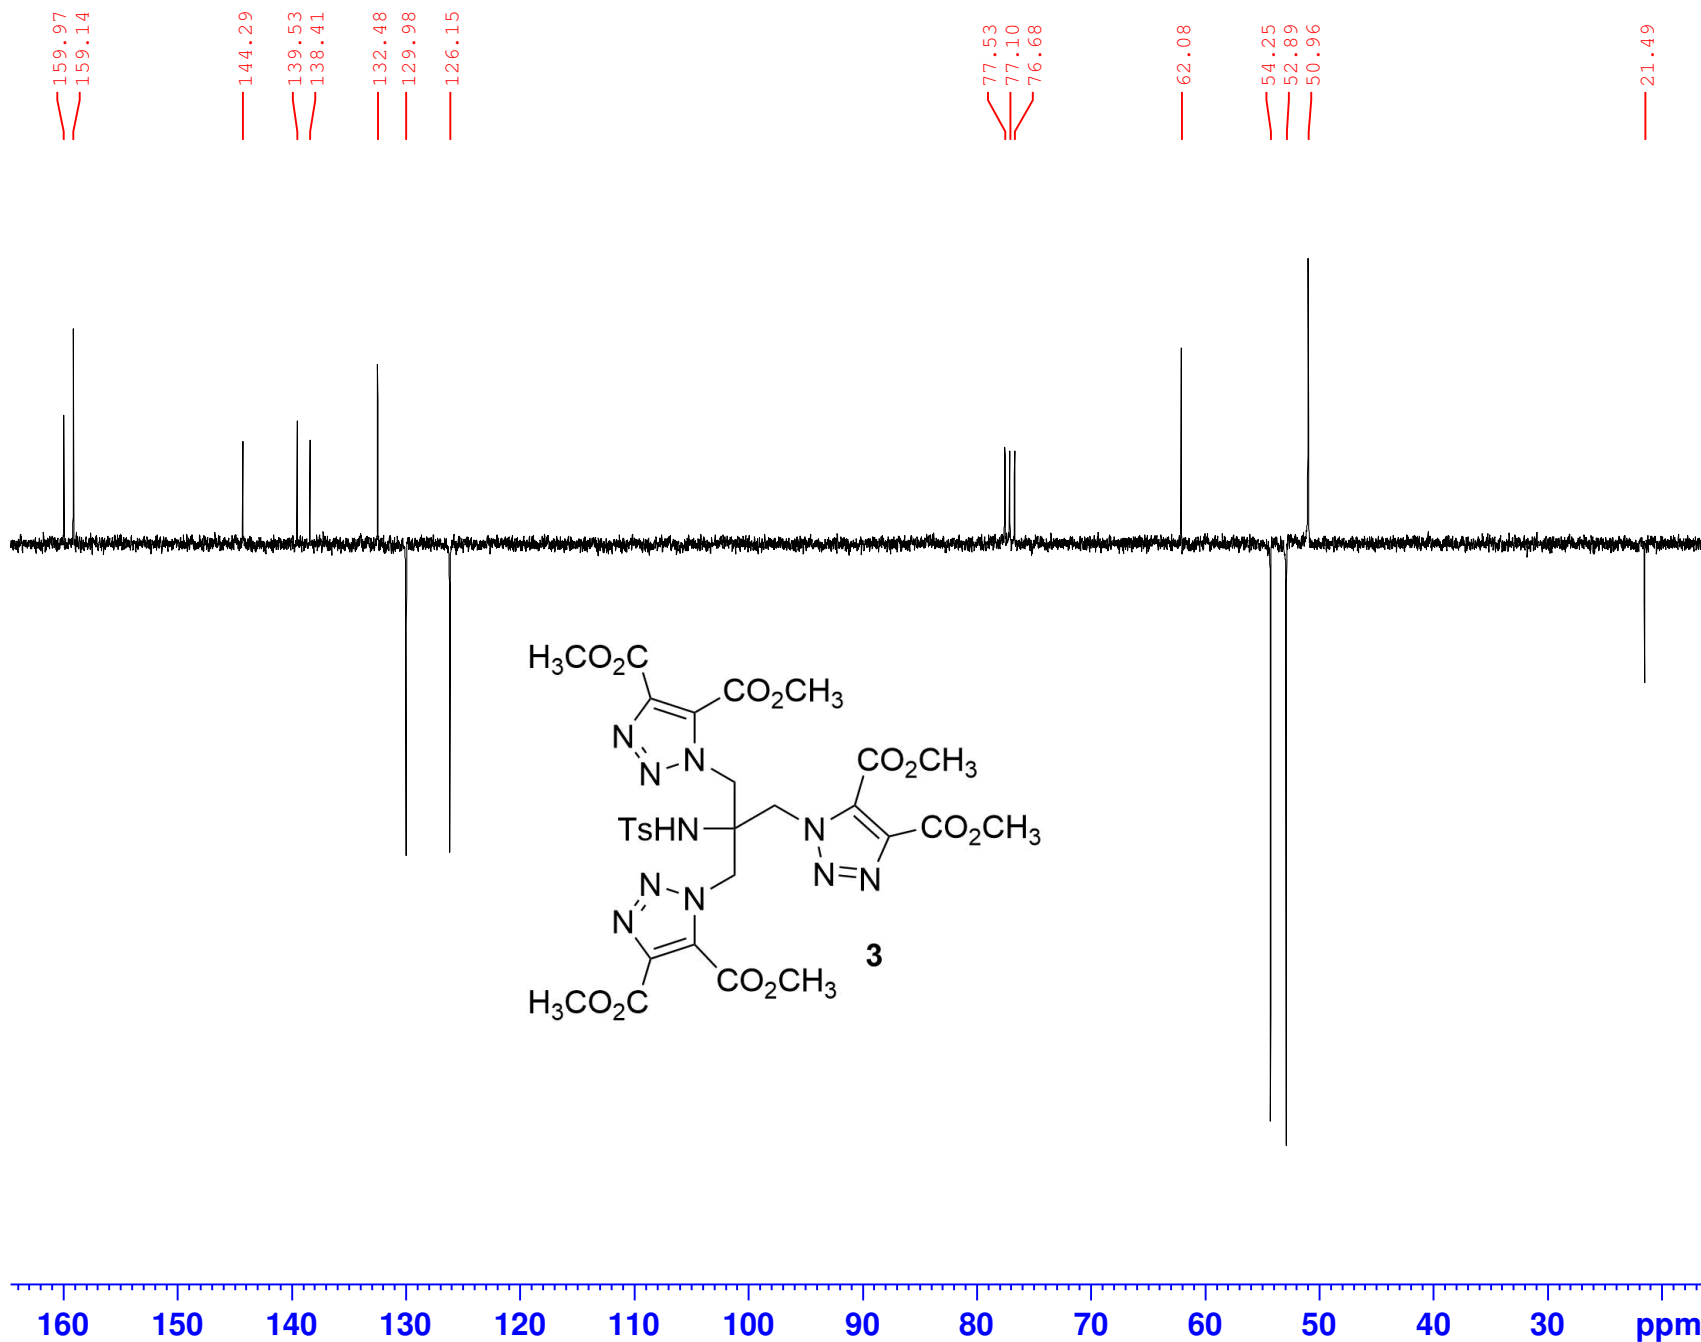

```

Current Data Parameters
NAME           AA 3
EXPNO          2
PROCNO         1

F2 - Acquisition Parameters
Date_          20201203
Time           10.06
INSTRUM        spect
PROBHD         5 mm PABBO BB/
PULPROG        jmod
TD             65536
SOLVENT        CDC13
NS             73
DS             4
SWH            18028.846 Hz
FIDRES         0.275098 Hz
AQ            1.8175317 sec
RG             912
DW            27.733 usec
DE            6.50 usec
TE            294.5 K
CNST2         145.0000000
CNST11        1.0000000
D1            2.00000000 sec
D20           0.00689655 sec
TD0           1

===== CHANNEL f1 =====
SFO1           75.4752953 MHz
NUC1            13C
P1              8.50 usec
P2             17.00 usec
PLW1          41.00000000 W

===== CHANNEL f2 =====
SFO2          300.1312005 MHz
NUC2            1H
CPDPRG[2]      waltz16
PCPD2           90.00 usec
PLW2          19.00000000 W
PLW12         0.25861001 W

F2 - Processing parameters
SI             32768
SF            75.4677485 MHz
WDW            EM
SSB            0
LB             1.00 Hz
GB            0
PC             1.40
    
```

Figure S14: <sup>13</sup>C-NMR 1D spectrum of compound (3)

Supplementary Materials of tetramethyl 1,1'-(2-((4,5-bis(methoxycarbonyl)-1H-1,2,3-triazol-1-yl)methyl)-2-((4-methylphenyl) sulfonamido)propane-1,3-diyl)bis(1H-1,2,3-triazole-4,5-dicarboxylate)

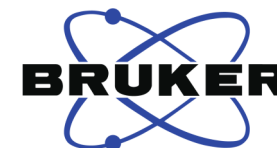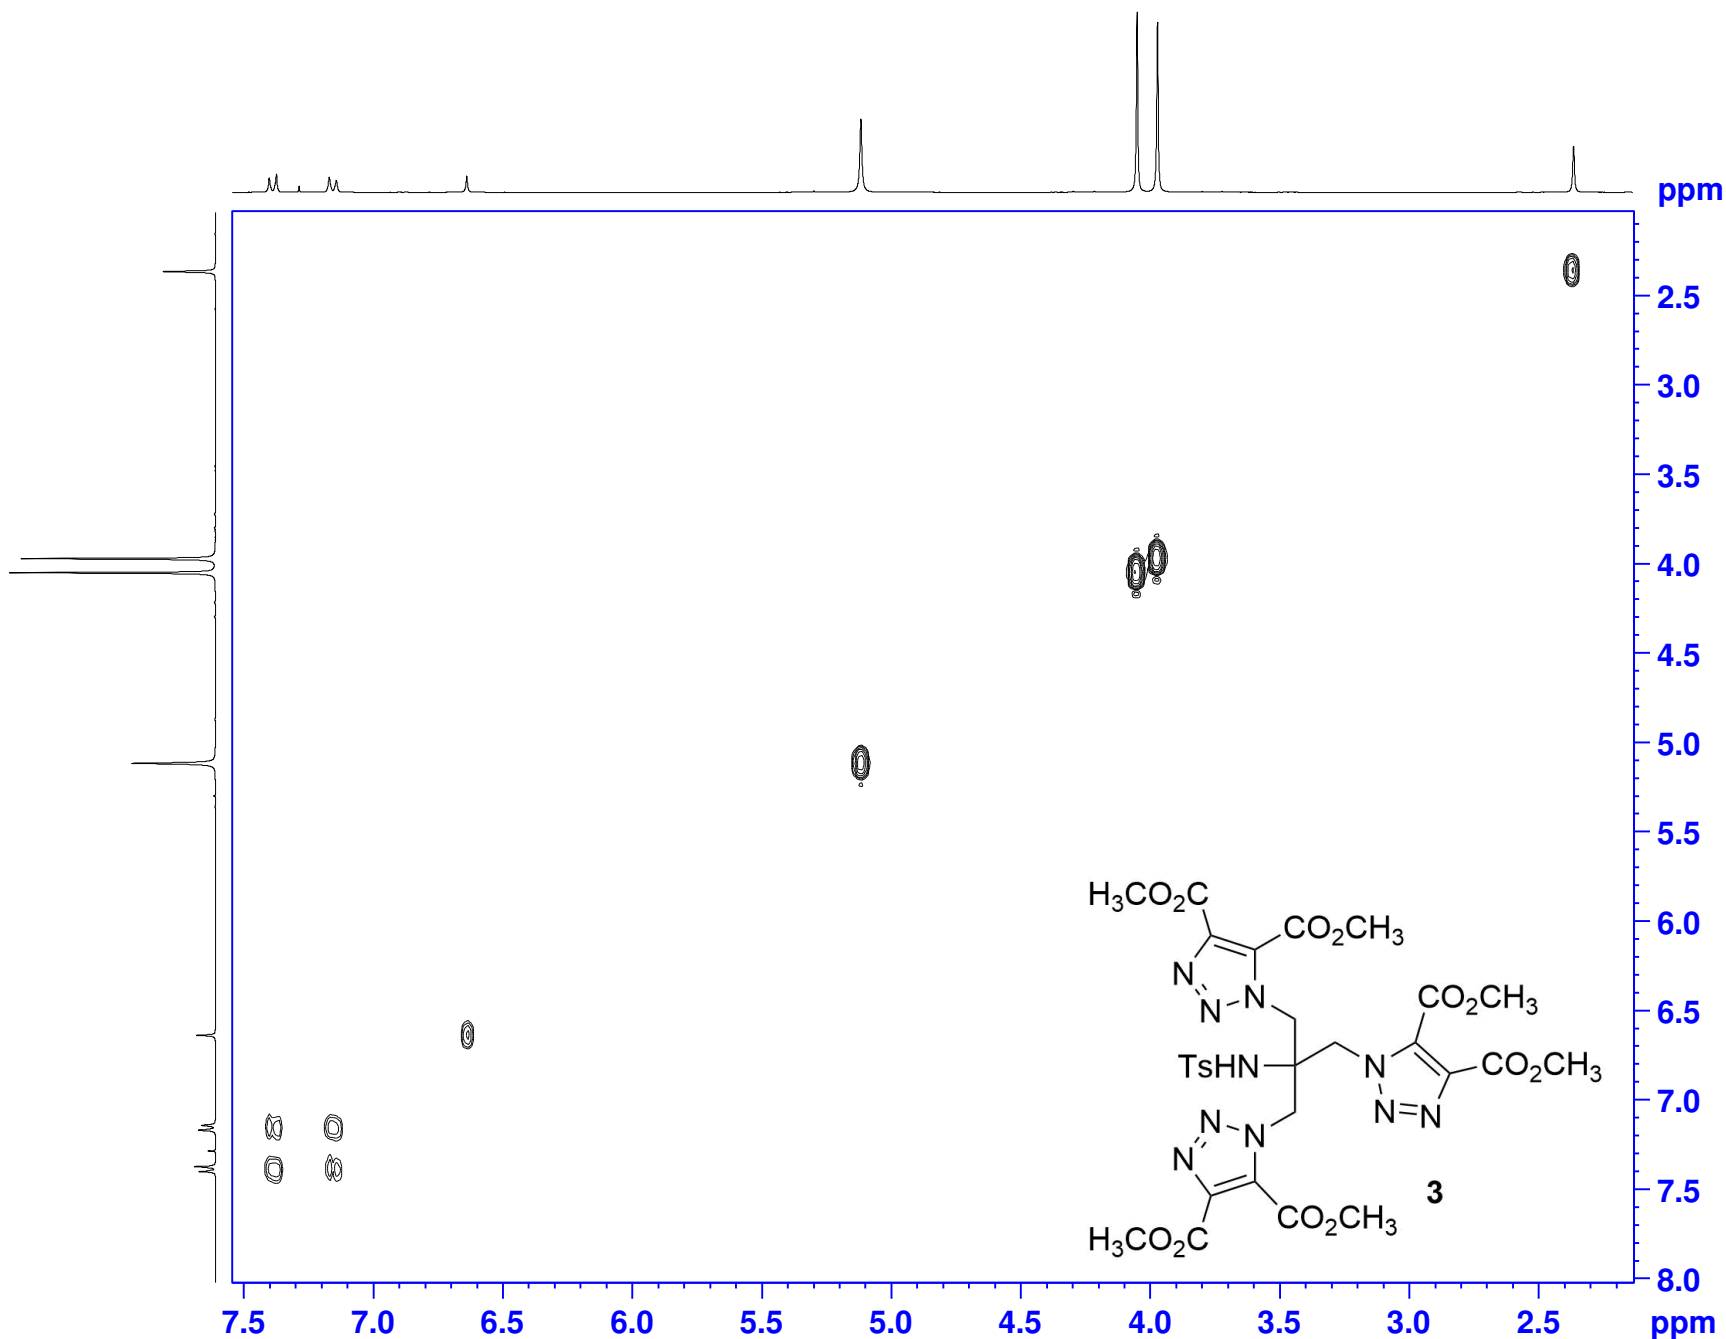

```

Current Data Parameters
NAME          AA 3
EXPNO         3
PROCNO        1

F2 - Acquisition Parameters
Date_         20201203
Time          10.18
INSTRUM       spect
PROBHD        5 mm PABBO BB/
PULPROG       cosygpppqf
TD            2048
SOLVENT       CDCl3
NS            1
DS            8
SWH           4006.410 Hz
FIDRES        1.956255 Hz
AQ            0.2555904 sec
RG            128
DW            124.800 usec
DE            6.50 usec
TE            294.1 K
D0            0.00000300 sec
D1            2.00000000 sec
D11           0.03000000 sec
D12           0.00002000 sec
D13           0.00000400 sec
D16           0.00020000 sec
IN0           0.00024960 sec

===== CHANNEL f1 =====
SFO1          300.1318044 MHz
NUC1          1H
P0            11.00 usec
P1            11.00 usec
P17           2500.00 usec
PLW1          19.00000000 W
PLW10         2.55439997 W

===== GRADIENT CHANNEL =====
GPNAM[1]      SMSQ10.100
GPZ1          10.00 %
P16           1000.00 usec

F1 - Acquisition parameters
TD            128
SFO1          300.1318 MHz
FIDRES        31.300079 Hz
SW            13.349 ppm
FnMODE       QF

F2 - Processing parameters
SI            1024
SF            300.1300000 MHz
WDW           QSINE
SSB           0
LB            0 Hz
GB            0
PC            1.40

F1 - Processing parameters
SI            1024
MC2           QF
SF            300.1300000 MHz
WDW           QSINE
SSB           0
LB            0 Hz
GB            0
  
```

Figure S15: 2D COSY spectrum of compound (3)

Supplementary Materials of tetramethyl 1,1'-(2-((4,5-bis(methoxycarbonyl)-1H-1,2,3-triazol-1-yl)methyl)-2-((4-methylphenyl) sulfonamido)propane-1,3-diyl)bis(1H-1,2,3-triazole-4,5-dicarboxylate)

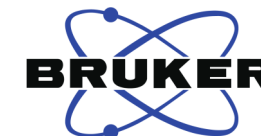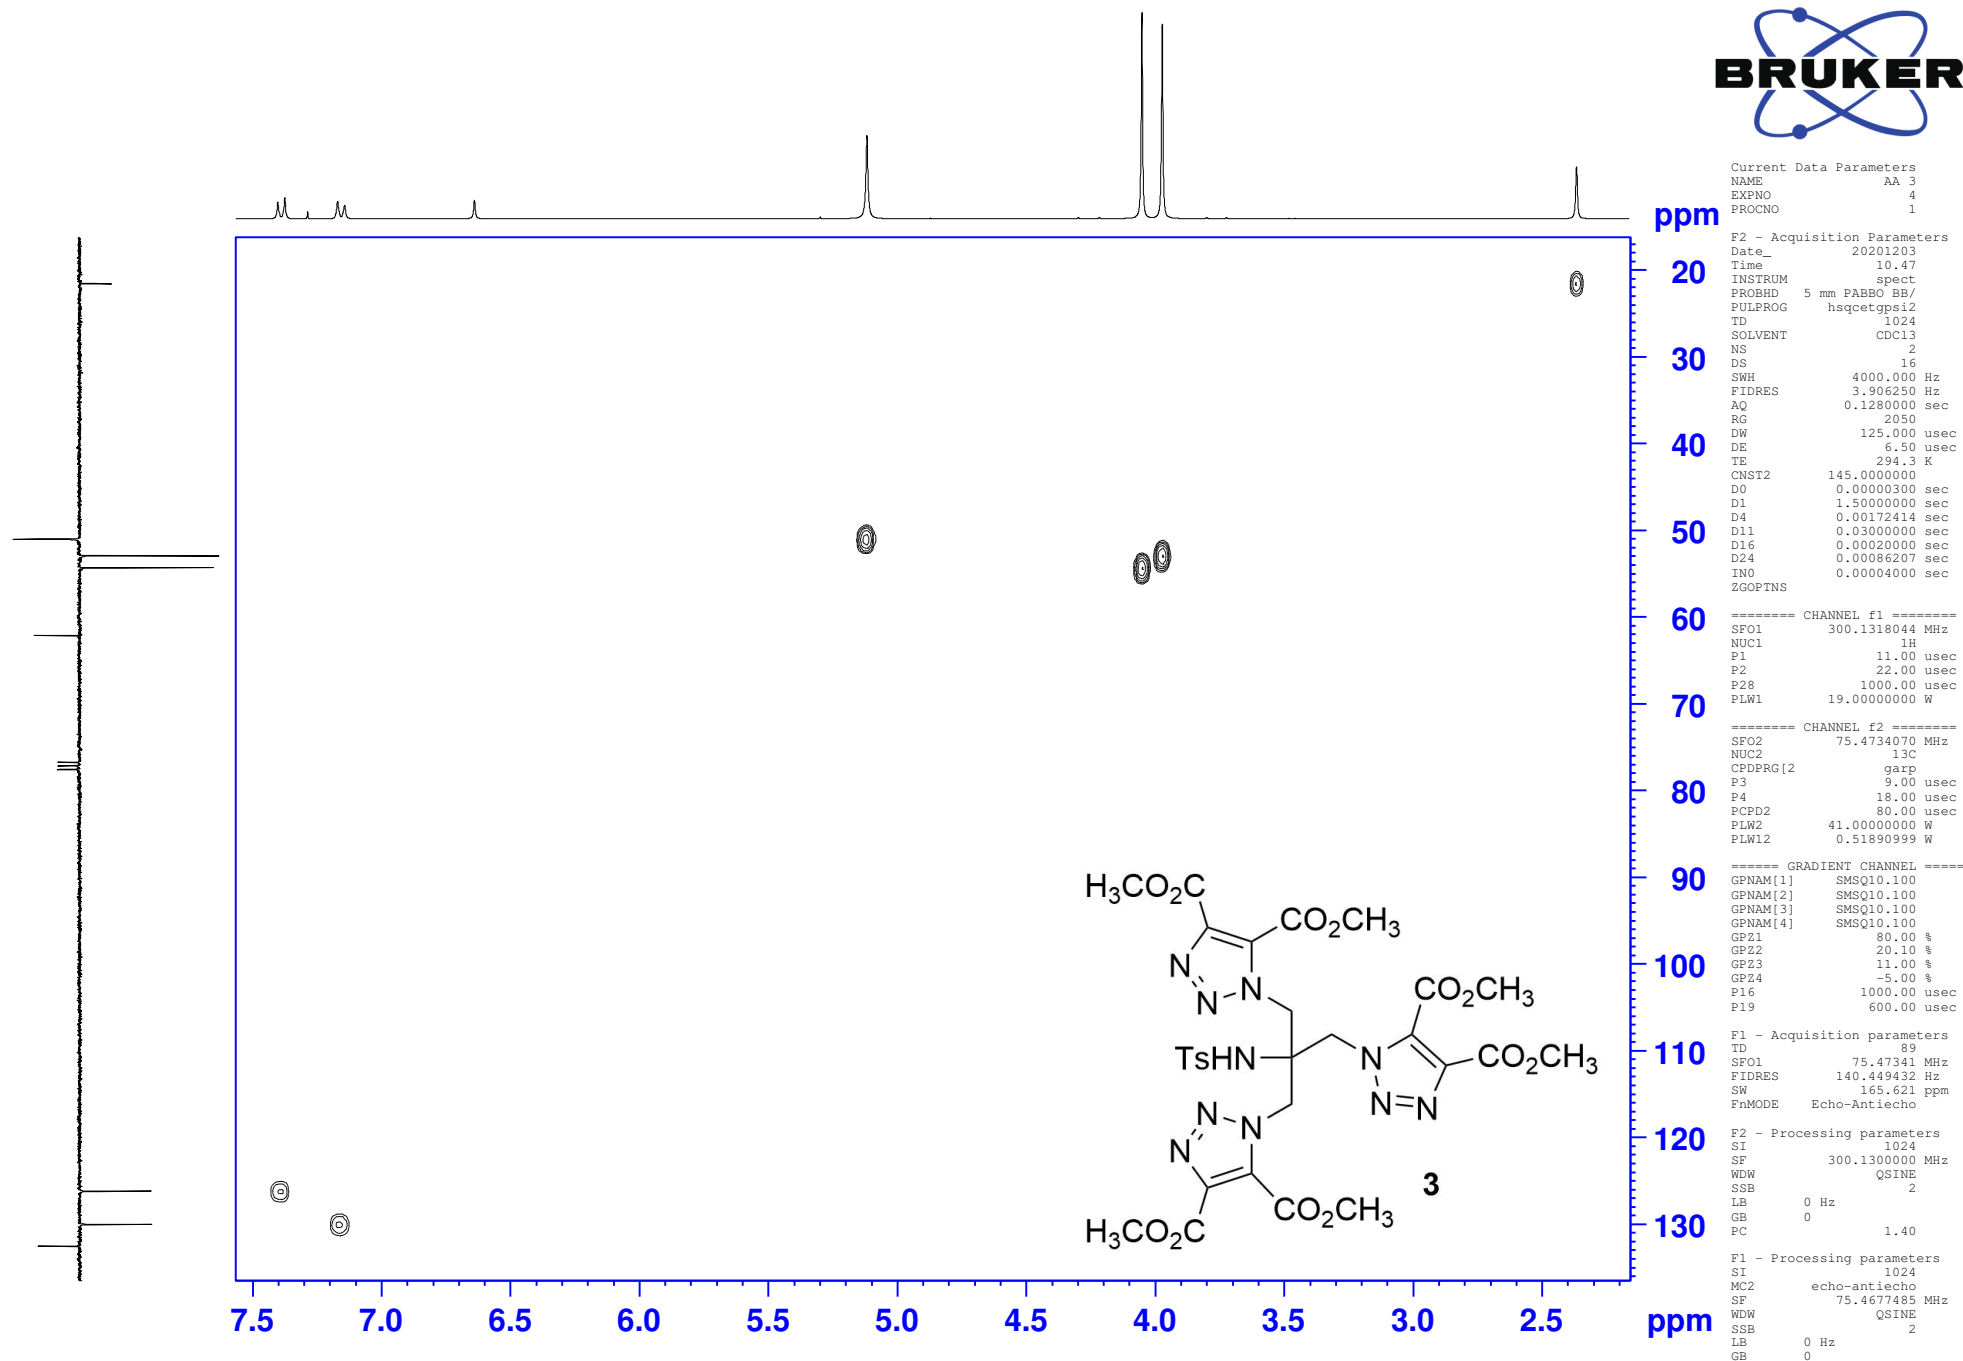

Figure S16: 2D HSQC spectrum of compound (3)
